# Supplementary material for: Total synthesis of aspidostomide G from a brominated tryptamine
Source: Royal Society of Chemistry journal article supplement (doi:10.1039/d3ob00672g), 2023-01-01
Supplement: d3ob00672g1.pdf [file d3ob00672g1.pdf]

## Supporting Information

### Total Synthesis of Aspidostomide G from a Brominated Tryptamine

Bo-You Wu, Fang-Yi Shih, Yu-Tung Tsai, Chia-Yen Chu, and Cheng-Kun Lin\*

*Department of Chemistry, National Chung Hsing University, Taichung 402, Taiwan*

*E-mail: cklin93@nchu.edu.tw*

| Table of Content                             | Pages |
|----------------------------------------------|-------|
| A. General information                       | S2    |
| B. Experimental section                      | S2    |
| C. LRMS Spectra for brominated compounds     | S11   |
| D. NMR Spectra for the synthesized compounds | S15   |
| References                                   | S31   |

## A. General Information

Unless otherwise noted, all reagents and solvents were obtained commercially and used without further purification.  $^1\text{H}$  and  $^{13}\text{C}$  NMR spectra were recorded on a Jeol-400 MHz spectrometer. Chloroform- $d$  ( $\delta = 7.24$ ) or DMSO- $d_6$  ( $\delta = 2.49$ ) or acetone- $d_6$  ( $\delta = 2.05$ ) was used as internal standard in  $^1\text{H}$  NMR spectra. The center peak of chloroform- $d$  ( $\delta = 77.0$ ) or DMSO- $d_6$  ( $\delta = 39.5$ ) or acetone- $d_6$  ( $\delta = 29.9$ ) was used as internal standard in  $^{13}\text{C}$  NMR spectra. High-resolution mass spectrometry (HRMS) analyses were determined on a Thermo Scientific Orbitrap LTQ XL mass spectrometer. Melting points were measured on a melting point apparatus with a capillary melting point tube. Thin-layer chromatography (TLC) plates were visualized by exposure to ultraviolet light at 254 nm and/or immersion in a staining solution (phosphomolybdic acid, potassium permanganate, ninhydrin, or *p*-anisaldehyde) followed by heating on a hot plate. Flash chromatography was carried out utilizing silica gel 60, 70-230 mesh ASTM.

## B. Experimental section

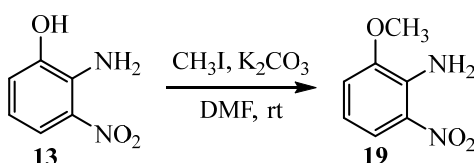

### Compound 19.<sup>S1</sup>

To the flask was added 2-amino-3-nitrophenol (**13**) (15.4 g, 100 mmol), potassium carbonate (27.6 g, 200 mmol, 2 equiv) and DMF (100 mL). The mixture was then stirred at room temperature for 3 h. Once the reaction was complete (monitored by TLC), ice water (500 mL) was poured into the mixture and the product was precipitated. The solid was collected by filtration through a Büchner funnel to give the title compound as a yellow solid (15.3 g, 91%).

$R_f$ : 0.2 (hexanes/EtOAc = 3:1). M.p. 62.5–63.2 °C.  $^1\text{H}$  NMR (400 MHz,  $\text{CDCl}_3$ )  $\delta$  7.64 (dd,  $J = 8.9, 1.2$  Hz, 1H), 6.82 (d,  $J = 7.7$  Hz, 1H), 6.53 (dd,  $J = 8.9, 7.7$  Hz, 1H), 6.40 (s, 2H), 3.85 (s, 3H).  $^{13}\text{C}\{^1\text{H}\}$  NMR (100 MHz,  $\text{CDCl}_3$ )  $\delta$  148.0, 136.9, 131.3, 117.0, 114.4, 113.1, 56.1. HRMS (EI): calculated for  $\text{C}_7\text{H}_8\text{N}_2\text{O}_3$  ( $\text{M}^+$ ), 168.0535, found 168.0543.

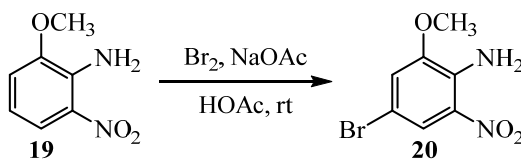

### Compound 20.<sup>S2</sup>

To the flask was added compound **19** (16.8 g, 100 mmol), sodium acetate (16.4 g, 200 mmol, 2 equiv) and acetic acid (100 mL). The mixture was stirred for 10 min until all solids were dissolved. A solution of

bromine (5.1 mL, 100 mmol, 1 equiv) in acetic acid (100 mL) was added dropwise into the previous mixture in an ice-water bath. The reaction was warmed to room temperature and stirred for an additional hour. Ice water (500 mL) was poured into the mixture and the product precipitated. The solid was collected by filtration through a Büchner funnel to give the title compound as a red solid (23.6 g, 96%).

$R_f$ : 0.45 (hexanes/EtOAc = 3:1). M.p. 126–127.4 °C.  $^1\text{H}$  NMR (400 MHz,  $\text{CDCl}_3$ )  $\delta$  7.85 (d,  $J$  = 2.1 Hz, 1H), 6.90 (d,  $J$  = 1.9 Hz, 1H), 6.43 (s, 2H), 3.89 (s, 3H).  $^{13}\text{C}\{^1\text{H}\}$  NMR (100 MHz,  $\text{CDCl}_3$ )  $\delta$  148.6, 136.3, 131.4, 119.3, 116.5, 106.1, 56.6. HRMS (EI): calculated for  $\text{C}_7\text{H}_7\text{BrN}_2\text{O}_3$  ( $\text{M}^+$ ), 245.9640, found 245.9639.

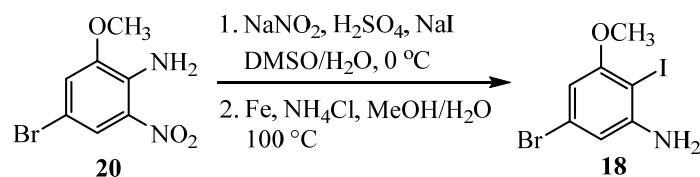

### Compound 18.

Compound **20** (37.1 g, 150 mmol) was added to a mixture of DMSO (300 mL) and  $\text{H}_2\text{SO}_4$  (240 mL, 30% aqueous solution). The resulting mixture was stirred in an ice-water bath for 5 min. The mixture was then treated with a solution of sodium nitrite (31.0 g, 450 mmol, 3 equiv) in water (40 mL). The reaction was stirred at 0 °C for 1.5 h and then treated, in one portion, with a solution of sodium iodide (67.5 g, 450 mmol, 3 equiv) in water (40 mL). After the completion of the reaction by TLC analysis (another 1.5 h), the mixture was then extracted with  $\text{Et}_2\text{O}$  (500 mL  $\times$  3). The collected organic layers were washed with saturated aqueous sodium thiosulfate, brine then dried over anhydrous  $\text{MgSO}_4$  and concentrated under reduced pressure to give the crude iodide **21** as an orange-brown solid.

Without any purification, the crude iodide was dissolved in  $\text{MeOH/H}_2\text{O}$  (500 mL, 1/1 v/v) and iron (41.9 g, 750 mmol, 5 equiv) and ammonium chloride (40.1 g, 750 mmol, 5 equiv) were added respectively. After stirring under refluxing for 12 h, the reaction mixture was filtered and the filtrate was concentrated. After the dilution of the residue with EtOAc (500 mL), the mixture was washed with brine. The separated aqueous layer was further extracted with EtOAc. The combined organic layers were dried over anhydrous  $\text{MgSO}_4$ , filtered and concentrated under reduced pressure. The residue was purified by column chromatography [silica gel, hexanes/ethyl acetate = 40/1] to afford the title compound (38.9 g, 79% over 2 steps) as a pale yellow solid.

$R_f$ : 0.7 (hexanes/EtOAc = 3:1). M.p. 85.9–87.2 °C.  $^1\text{H}$  NMR (400 MHz,  $\text{CDCl}_3$ )  $\delta$  6.55 (d,  $J$  = 1.9 Hz, 1H), 6.33 (d,  $J$  = 1.9 Hz, 1H), 4.26 (s, 2H), 3.82 (s, 3H).  $^{13}\text{C}\{^1\text{H}\}$  NMR (100 MHz,  $\text{CDCl}_3$ )  $\delta$  159.0, 148.8, 123.1, 110.2, 103.9, 73.9, 56.5. HRMS (EI): calculated for  $\text{C}_7\text{H}_7\text{BrINO}$  ( $\text{M}^+$ ), 326.8756, found 326.8752.

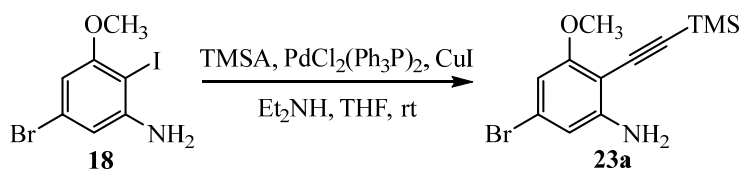

### Compound 23a.

A mixture of  $\text{PdCl}_2(\text{PPh}_3)_2$  (970 mg, 1.38 mmol, 0.069 equiv) and  $\text{CuI}$  (520 mg, 2.8 mmol, 0.14 equiv) in a flask was vacuumed and then charged with an atmosphere of nitrogen. To this flask were sequentially added anhydrous THF (15 mL),  $\text{Et}_2\text{NH}$  (15 mL), and compound **18** (6.54 g, 20 mmol). The mixture was stirred for 10 min, followed by the addition of TMSA (trimethylsilylacetylene, 3.4 mL, 24 mmol, 1.2 equiv), and then stirred for 16 h under a mixed atmosphere of nitrogen and hydrogen [4/1 (v/v)]. The resulting mixture was filtrated, and the volatiles were removed under reduced pressure. The residue was purified by column chromatography [silica gel, hexanes/ethyl acetate 30/1] to afford the title compound (5.55 g, 93%) as a yellow oil.

$R_f$ : 0.75 (hexanes/ $\text{EtOAc}$  = 3:1).  $^1\text{H}$  NMR (400 MHz,  $\text{CDCl}_3$ )  $\delta$  6.49 (d,  $J$  = 1.5 Hz, 1H), 6.35 (d,  $J$  = 1.4 Hz, 1H), 4.34 (s, 2H), 3.81 (s, 3H), 0.26 (s, 9H).  $^{13}\text{C}\{^1\text{H}\}$  NMR (100 MHz,  $\text{CDCl}_3$ )  $\delta$  161.3, 150.4, 123.8, 110.0, 105.1, 103.7, 97.3, 96.2, 56.0, 0.2. HRMS (EI): calculated for  $\text{C}_{12}\text{H}_{16}\text{BrNOSi}$  ( $\text{M}^+$ ), 297.0185, found 297.0190.

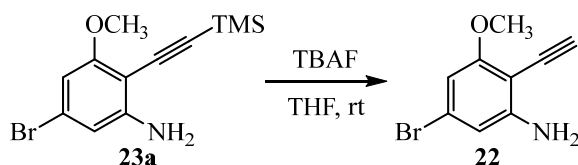

### Compound 22.

Compound **23a** (5.55 g, 18.6 mmol) was dissolved in THF (85 mL) and TBAF (1M solution in THF, 19 mL, 18.6 mmol, 1 equiv) was added. After stirring at room temperature for 0.5 h, the mixture was concentrated and the residue was purified by column chromatography [silica gel, hexanes/ethyl acetate 40/1] to afford the title compound (3.99 g, 95%) as a brown solid.

$R_f$ : 0.6 (hexanes/ $\text{EtOAc}$  = 3:1). M.p. 83.2–84.6 °C.  $^1\text{H}$  NMR (400 MHz,  $\text{CDCl}_3$ )  $\delta$  6.51 (d,  $J$  = 1.6 Hz, 1H), 6.39 (d,  $J$  = 1.6 Hz, 1H), 4.34 (s, 2H), 3.84 (s, 3H), 3.64 (s, 1H).  $^{13}\text{C}\{^1\text{H}\}$  NMR (100 MHz,  $\text{CDCl}_3$ )  $\delta$  161.7, 150.6, 124.1, 110.1, 103.7, 94.9, 87.3, 76.4, 56.0. HRMS (EI): calculated for  $\text{C}_9\text{H}_8\text{BrNO}$  ( $\text{M}^+$ ), 224.9789, found 224.9797.

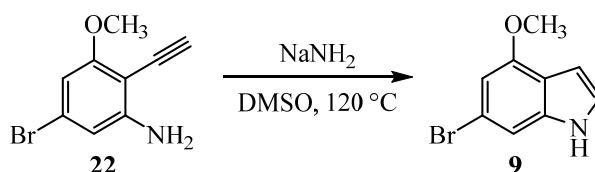

### Compound 9.<sup>S3</sup>



To a solution of compound **22** (5.94 g, 26.3 mmol) in anhydrous DMSO (53 mL) was added sodium amide (5.12 g, 131 mmol, 5 equiv). The reaction mixture was stirred at 120 °C for 16 h. After cooling to room temperature, the reaction mixture was then poured into water (50 mL) and extracted with Et<sub>2</sub>O (100 mL × 3). The combined organic layers were washed with saturated aqueous NaHCO<sub>3</sub>, dried over anhydrous MgSO<sub>4</sub> and concentrated under reduced pressure to afford the title compound (5.23 g, 88%) as a white solid. *R*<sub>f</sub>: 0.6 (hexanes/EtOAc = 3:1). M.p. 85.3–87.4 °C. <sup>1</sup>H NMR (400 MHz, CDCl<sub>3</sub>) δ 8.10 (s, 1H), 7.11 (t, *J* = 1.0 Hz, 1H), 7.00 (dd, *J* = 3.2, 2.5 Hz, 1H), 6.69 (d, *J* = 1.2 Hz, 1H), 6.64 (t, *J* = 2.3 Hz, 1H), 3.93 (s, 3H). <sup>13</sup>C{<sup>1</sup>H} NMR (100 MHz, CDCl<sub>3</sub>) δ 153.3, 137.2, 123.1, 117.4, 115.5, 107.5, 103.7, 99.8, 55.4. HRMS (EI): calculated for C<sub>9</sub>H<sub>8</sub>BrNO (M<sup>+</sup>), 224.9789, found 224.9783.

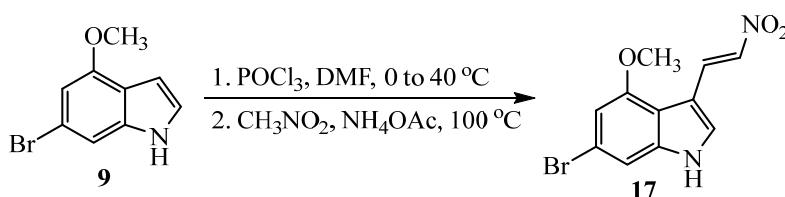

### Compound 17.<sup>S3b</sup>

A solution of POCl<sub>3</sub> (1.24 mL, 13.3 mmol, 1.3 equiv) in anhydrous DMF (12 mL) was stirred in an ice-water bath for 30 min. Then a solution of compound **9** (2.3 g, 10.2 mmol) in anhydrous DMF (12 mL) was added dropwise over a period of 10 min to the above mixture. The resulting mixture was stirred for 30 min at the same temperature, then heated to 40 °C for 1 h. The reaction mixture was then chilled in an ice-water bath, and 1N aqueous NaOH solution (24 mL) was added until the mixture became basic. The mixture was placed at low temperature (5 °C) for 20 min. 1N aqueous HCl solution (24 mL) was added until the mixture became acidic, and then was extracted with EtOAc (50 mL × 3). The combined organic layers were dried over anhydrous MgSO<sub>4</sub> and concentrated under reduced pressure to afford the crude product, which was purified by column chromatography [silica gel, hexanes/ethyl acetate 40/1] to afford the aldehyde (2.33 g, 90%) as white solid.

To a solution of the aldehyde intermediate (3.64 g, 14.3 mmol) in nitromethane (29 mL) was added ammonium acetate (1.10 g, 14.3 mmol, 1 equiv) at room temperature. The reaction mixture was then heated to 100 °C for 2 h, then chilled in an ice-water bath for 12 h. The precipitate was filtered, and the solid was washed with toluene (10 mL). The combined organic layers were concentrated to give the title compound quantitatively (4.25 g) as a brown solid.

*R*<sub>f</sub>: 0.3 (hexanes/EtOAc = 3:1). M.p. 226.3–227.9 °C. <sup>1</sup>H NMR (400 MHz, DMSO-*d*<sub>6</sub>) δ 8.49 (d, *J* = 13.3 Hz, 1H), 8.25 (s, 1H), 8.07 (d, *J* = 13.3 Hz, 1H), 7.28 (d, *J* = 1.4 Hz, 1H), 6.86 (d, *J* = 1.2 Hz, 1H), 3.96 (s, 3H). <sup>13</sup>C{<sup>1</sup>H} NMR (100 MHz, DMSO-*d*<sub>6</sub>) δ 154.1, 139.0, 134.7, 132.9, 132.4, 116.2, 114.4, 108.7, 107.9, 106.0, 56.0. HRMS (EI): calculated for C<sub>11</sub>H<sub>9</sub>O<sub>3</sub>N<sub>2</sub>Br (M<sup>+</sup>), 294.9797, found 294.9793.

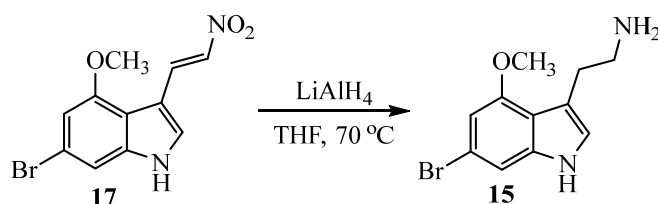**Compound 15.**<sup>S3b</sup>

To a solution of compound **17** (1.54 g, 5.19 mmol) in THF (45 mL) in an ice-water bath was slowly added  $\text{LiAlH}_4$  (1.18 g, 31.1 mmol, 6 equiv). The reaction mixture was then heated to 70 °C for 3.5 h. After the reaction, the resulting mixture was chilled in an ice-water bath, and excess  $\text{LiAlH}_4$  was quenched by the dropwise addition of water (1 mL), 6N aqueous KOH solution (1 mL) and water (2 mL) until no further gas evolution was observed. The mixture was diluted with EtOAc (150 mL), filtered through Celite, dried over anhydrous  $\text{MgSO}_4$  and concentrated to afford the title compound quantitatively (1.40 g) as a brown oil.

$R_f$ : 0.1 (DCM/MeOH = 10:1).  $^1\text{H}$  NMR (400 MHz,  $\text{DMSO}-d_6$ )  $\delta$  10.90 (s, 1H), 7.09 (d,  $J = 1.5$  Hz, 1H), 6.97 (s, 1H), 6.54 (d,  $J = 1.5$  Hz, 1H), 3.84 (s, 3H), 2.85–2.75 (m, 4H).  $^{13}\text{C}\{^1\text{H}\}$  NMR (100 MHz,  $\text{DMSO}-d_6$ )  $\delta$  154.6, 138.2, 122.3, 115.9, 113.8, 112.7, 107.5, 102.4, 55.4, 42.7, 30.0. HRMS (EI): calculated for  $\text{C}_{11}\text{H}_{13}\text{BrN}_2\text{O}$  ( $\text{M}^+$ ), 268.0211, found 268.0201.

**Scheme S1.** Synthetic route of the trichloromethyl ketone **16**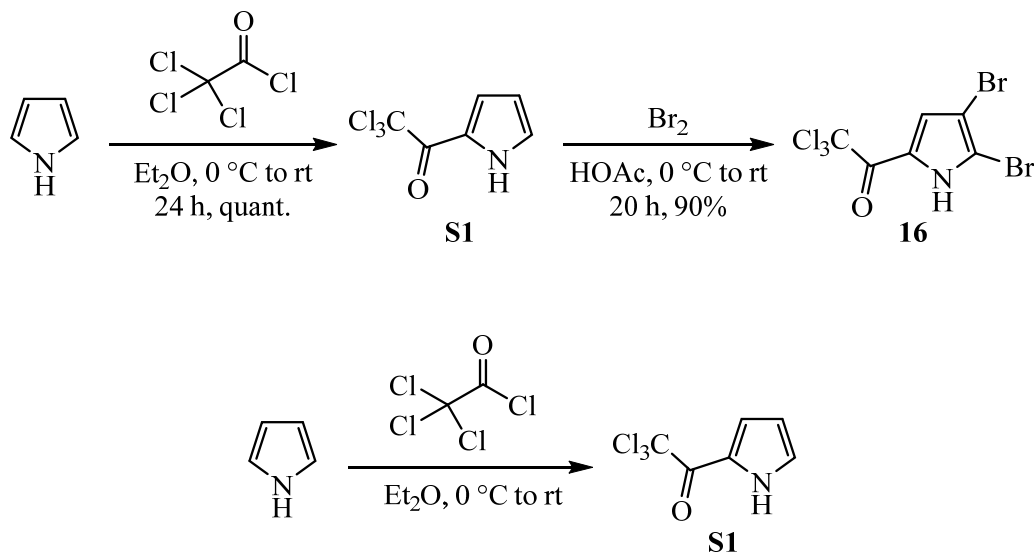**Compound S1.**<sup>S4</sup>

To a solution of pyrrole (3 mL, 43.2 mmol) in anhydrous ether (50 mL) in an ice-water bath was added a solution of trichloroacetyl chloride (5.3 mL, 47.6 mmol, 1.1 equiv) in anhydrous ether (20 mL). The reaction mixture was then stirred at room temperature for 24 h. After the reaction, the reaction mixture was treated with saturated aqueous sodium bicarbonate solution (200 mL). The mixture was extracted with EtOAc (200 mL  $\times$  2). The combined organic layers were washed with brine (200 mL), dried over anhydrous

MgSO<sub>4</sub>, and concentrated under reduced pressure to afford the title compound quantitatively (10.0 g) as a black solid.

R<sub>f</sub>: 0.5 (hexanes/EtOAc = 3:1). <sup>1</sup>H NMR (400 MHz, CDCl<sub>3</sub>) δ 9.48 (s, 1H), 7.37 (s, 1H), 7.15 (s, 1H), 6.38–6.36 (m, 1H). <sup>13</sup>C{<sup>1</sup>H} NMR (100 MHz, CDCl<sub>3</sub>) δ 173.3, 127.4, 122.9, 121.3, 111.8, 94.9. HRMS (APCI) *m/z*: [M – H]<sup>+</sup> calculated for C<sub>6</sub>H<sub>3</sub>ONCl<sub>3</sub> 209.9275, found 209.9282.

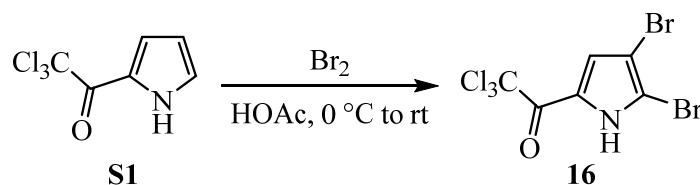

### Compound 16.<sup>S5</sup>

To a solution of compound **S1** (10.0 g, 47.1 mmol) in acetic acid (50 mL) in an ice-water bath was slowly added bromine (5.6 mL, 109 mmol, 2.3 equiv). After addition, the reaction mixture was then stirred at room temperature for 20 h. The reaction was quenched with saturated aqueous sodium hyposulfite solution (100 mL). The resulting mixture was extracted with EtOAc (200 mL × 2). The combined organic layers were washed with saturated aqueous sodium bicarbonate solution (200 mL) and brine (200 mL), dried over anhydrous MgSO<sub>4</sub>, and concentrated under reduced pressure. The crude mixture was purified by column chromatography [silica gel, hexanes/ethyl acetate 30/1 (v/v)] to afford the title compound (15.8 g, 90%) as a white solid.

R<sub>f</sub>: 0.7 (hexanes/EtOAc = 3:1). <sup>1</sup>H NMR (400 MHz, CDCl<sub>3</sub>) δ 9.71 (s, 1H), 7.31 (d, *J* = 2.9 Hz, 1H). <sup>13</sup>C{<sup>1</sup>H} NMR (100 MHz, CDCl<sub>3</sub>) δ 172.0, 123.8, 123.1, 113.3, 102.4, 93.8. HRMS (APCI) *m/z*: [M – H]<sup>+</sup> calculated for C<sub>6</sub>HONBr<sub>2</sub>Cl<sub>3</sub> 365.7485, found 365.7483.

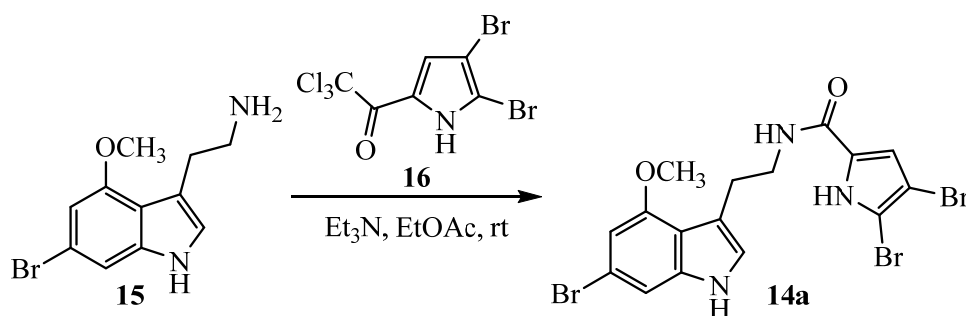

### Compound 14a.

To a solution of compound **15** (1.09 g, 4.06 mmol) and compound **16** (1.5 g, 4.87 mmol, 1.2 equiv) in EtOAc (9 mL) was added Et<sub>3</sub>N (1.41 mL, 10.2 mmol, 2.5 equiv) dropwise. The mixture was stirred at room temperature for 12 h. The volatiles were removed under reduced pressure. The residue was purified by column chromatography [silica gel, hexanes/ethyl acetate 10/1] to afford the title compound (1.25 g, 59%) as a pale yellow solid.

$R_f$ : 0.6 (hexanes/EtOAc = 1:1). M.p. 184.1–185.7 °C.  $^1\text{H}$  NMR (400 MHz,  $\text{CDCl}_3$ )  $\delta$  9.93 (s, 1H), 8.02 (s, 1H), 7.16 (s, 1H), 6.88 (s, 1H), 6.65 (s, 1H), 6.30 (s, 1H), 6.10 (s, 1H), 3.92 (s, 3H), 3.71–3.67 (m, 2H), 3.11 (t,  $J$  = 6.3 Hz, 2H).  $^{13}\text{C}\{^1\text{H}\}$  NMR (100 MHz,  $\text{CDCl}_3$ )  $\delta$  159.3, 154.4, 138.3, 127.3, 121.6, 116.3, 116.0, 113.6, 111.3, 107.9, 104.9, 104.1, 99.5, 55.6, 41.0, 26.2. HRMS (ESI)  $m/z$ :  $[\text{M} + \text{H}]^+$  calculated for  $\text{C}_{16}\text{H}_{15}\text{O}_2\text{N}_3\text{Br}_3$  517.8709, found 517.8697.

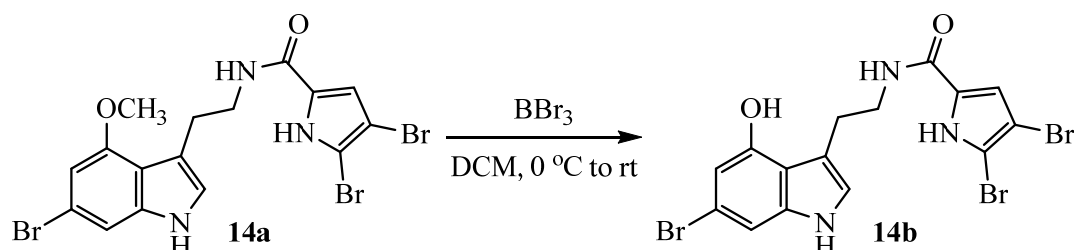

### Compound 14b.

To a solution of compound **14a** (950 mg, 1.83 mmol) in DCM (18 mL) in an ice-water bath was added dropwise of  $\text{BBr}_3$  (1M solution in DCM, 18 mL, 10 equiv). After addition, the mixture was then stirred at room temperature for 12 h. After the reaction was completed by TLC analysis, the mixture was extracted with DCM (50 mL) and EtOAc (50 mL). The combined organic layers were dried over anhydrous  $\text{MgSO}_4$  and concentrated under reduced pressure. The residue was purified by column chromatography [silica gel, hexanes/ethyl acetate 3/1 (v/v)] to afford the title compound (674 mg, 73%) as a dark green solid.

$R_f$ : 0.4 (hexanes/EtOAc = 1:1).  $^1\text{H}$  NMR (400 MHz,  $\text{DMSO}-d_6$ )  $\delta$  12.60 (s, 1H), 10.75 (s, 1H), 9.84 (s, 1H), 8.09 (t,  $J$  = 5.4 Hz, 1H), 6.93 (s, 2H), 6.89 (d,  $J$  = 2.6 Hz, 1H), 6.45 (d,  $J$  = 1.2 Hz, 1H), 3.48 (dd,  $J$  = 12.8, 6.8 Hz, 2H), 2.98 (t,  $J$  = 7.0 Hz, 2H).  $^{13}\text{C}\{^1\text{H}\}$  NMR (100 MHz,  $\text{DMSO}-d_6$ )  $\delta$  158.7, 152.5, 138.9, 128.4, 121.8, 115.7, 113.6, 112.4, 112.3, 105.9, 105.6, 104.2, 97.7, 40.1, 26.3. HRMS (EI): calculated for  $\text{C}_{15}\text{H}_{12}\text{Br}_3\text{N}_3\text{O}_2$  ( $\text{M}^+$ ) 502.8480, found 502.8470.

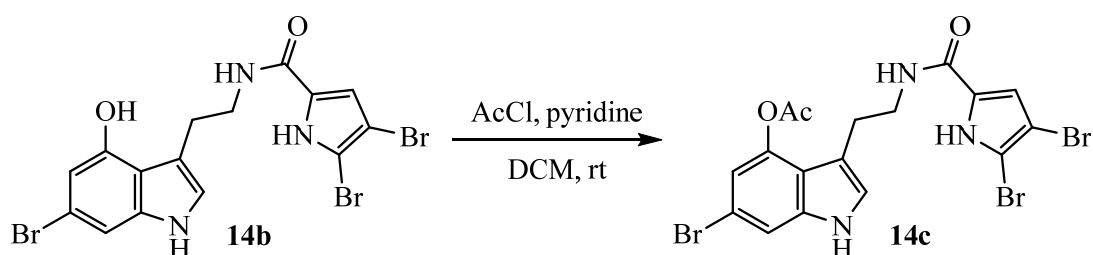

### Compound 14c.

To a solution of compound **14b** (200 mg, 390  $\mu\text{mol}$ ) in DCM (790  $\mu\text{L}$ ) was added acetyl chloride (34  $\mu\text{L}$ , 468  $\mu\text{mol}$ , 1.2 equiv) and pyridine (48  $\mu\text{L}$ , 585  $\mu\text{mol}$ , 1.5 equiv). The mixture was stirred at room temperature for 3 h. The volatiles were removed under reduced pressure. The residue was purified by column chromatography [silica gel, hexanes/ethyl acetate 3/1 (v/v)] to afford the title compound (187 mg, 87%) as a white solid.

$R_f$ : 0.4 (hexanes/EtOAc = 1:1).  $^1\text{H}$  NMR (400 MHz, DMSO- $d_6$ )  $\delta$  12.65 (d,  $J$  = 2.1 Hz, 1H), 11.19 (d,  $J$  = 1.6 Hz, 1H), 8.16 (t,  $J$  = 5.4 Hz, 1H), 7.42 (d,  $J$  = 1.6 Hz, 1H), 7.17 (d,  $J$  = 2.5 Hz, 1H), 6.91 (d,  $J$  = 1.6 Hz, 1H), 6.89 (d,  $J$  = 2.7 Hz, 1H), 3.43 (q,  $J$  = 6.8 Hz, 2H), 2.83 (t,  $J$  = 7.2 Hz, 2H), 2.36 (s, 3H).  $^{13}\text{C}\{^1\text{H}\}$  NMR (100 MHz, DMSO- $d_6$ )  $\delta$  169.5, 158.9, 143.9, 139.0, 128.4, 124.9, 119.0, 114.8, 112.5, 112.4, 112.0, 110.9, 104.5, 97.7, 40.3, 26.0, 20.8, HRMS (EI): calculated for  $\text{C}_{17}\text{H}_{14}\text{Br}_3\text{N}_3\text{O}_3$  ( $\text{M}^+$ ) 544.8585, found 544.8592.

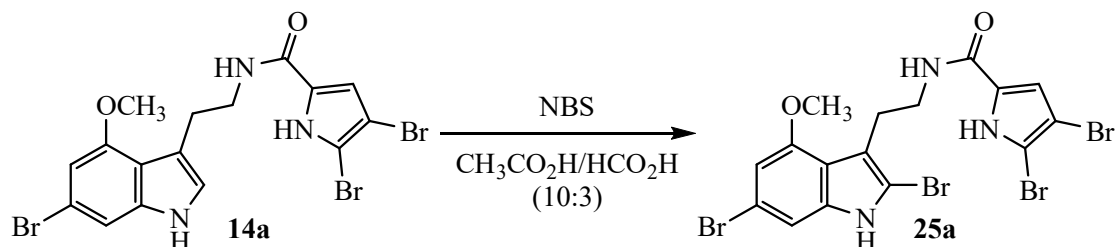

### Compound 25a.

To a solution of compound **14a** (200 mg, 385  $\mu\text{mol}$ ) in acetic acid (3.9 mL) and formic acid (1.17 mL). Then NBS (69 mg, 385  $\mu\text{mol}$ , 1 equiv) was added in the resulting mixture and stirred at room temperature for 20 min. The volatiles were removed under reduced pressure. The residue was purified by column chromatography [silica gel, hexanes/ethyl acetate 10/1] and then by TLC plate [dichloromethane/hexanes 15/1] for four developments to afford the title compound (99 mg, 43%) as a colorless solid.

$R_f$  = 0.65 (hexanes/EtOAc = 1:1). M.p. 178.3–179.2  $^{\circ}\text{C}$ .  $^1\text{H}$  NMR (400 MHz,  $\text{CDCl}_3$ )  $\delta$  9.98 (s, 1H), 8.14 (s, 1H), 7.07 (d,  $J$  = 1.2 Hz, 1H), 6.64 (d,  $J$  = 1.2 Hz, 1H), 6.27 (s, 1H), 6.09–6.05 (m, 1H), 3.88 (s, 3H), 3.65 (q,  $J$  = 6.0 Hz, 2H), 3.06 (t,  $J$  = 6.1 Hz, 2H).  $^{13}\text{C}\{^1\text{H}\}$  NMR (100 MHz,  $\text{CDCl}_3$ )  $\delta$  159.4, 153.2, 137.7, 127.3, 116.4, 116.2, 112.8, 111.4, 107.6, 107.3, 104.9, 99.5, 55.8, 40.5, 29.7, 25.5. HRMS (ESI)  $m/z$ :  $[\text{M} - \text{H}]^+$  calculated for  $\text{C}_{16}\text{H}_{12}\text{O}_2\text{N}_3\text{Br}_4$  593.7658, found 593.7676.

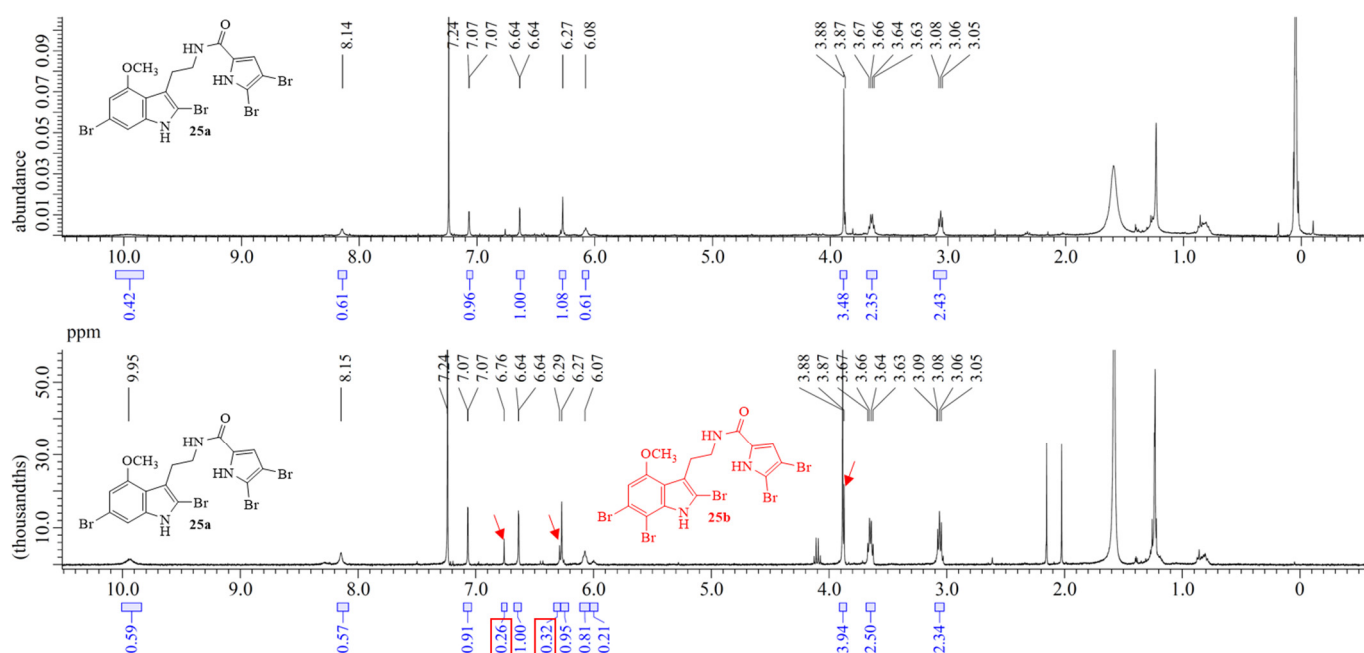

Figure S1. Comparing the clean proton NMR spectrum of **25a** with the mixed NMR spectrum of **25a** and **25b**

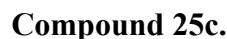

$R_f = 0.6$  (hexanes/EtOAc = 1:1).  $^1\text{H}$  NMR (400 MHz, DMSO- $d_6$ )  $\delta$  12.63 (d,  $J = 2.2$  Hz, 1H), 12.12 (s, 1H), 8.20 (t,  $J = 5.8$  Hz, 1H), 7.34 (d,  $J = 1.6$  Hz, 1H), 7.00 (d,  $J = 1.5$  Hz, 1H), 6.86 (d,  $J = 2.7$  Hz, 1H), 2.78 (t,  $J = 7.0$  Hz, 2H), 2.38 (s, 3H).  $^{13}\text{C}\{^1\text{H}\}$  NMR (100 MHz, DMSO- $d_6$ )  $\delta$  170.0, 159.4, 143.3, 139.0, 128.8, 119.4, 116.4, 113.5, 113.0, 112.1, 111.8, 110.7, 104.8, 98.2, 40.2, 29.5, 26.3. HRMS (EI): calculated for  $\text{C}_{17}\text{H}_{13}\text{Br}_4\text{N}_3\text{O}_3$  ( $\text{M}^+$ ) 622.7690, found 622.7698.

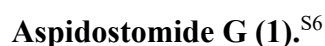

$R_f = 0.6$  (hexanes/EtOAc = 1:1).  $^1\text{H}$  NMR (400 MHz, acetone- $d_6$ )  $\delta$  11.63 (s, 1H), 10.54 (s, 1H), 9.07 (s, 1H), 6.90 (d,  $J = 1.5$  Hz, 1H), 6.68 (s, 1H), 6.53 (d,  $J = 1.5$  Hz, 1H), 3.52 (dd,  $J = 12.4, 6.5$  Hz, 2H), 2.95 (t,  $J = 6.5$  Hz, 2H).  $^{13}\text{C}\{^1\text{H}\}$  NMR (100 MHz, acetone- $d_6$ )  $\delta$  159.2, 151.1, 138.9, 128.6, 116.1, 114.9, 112.3, 112.0, 107.8, 107.5, 105.8, 104.1, 98.5, 40.2, 25.8. HRMS (EI): calculated for  $\text{C}_{15}\text{H}_{11}\text{Br}_4\text{N}_3\text{O}_2$  ( $\text{M}^+$ ) 580.7585, found 580.7593.

## C. LRMS Spectra for brominated compounds

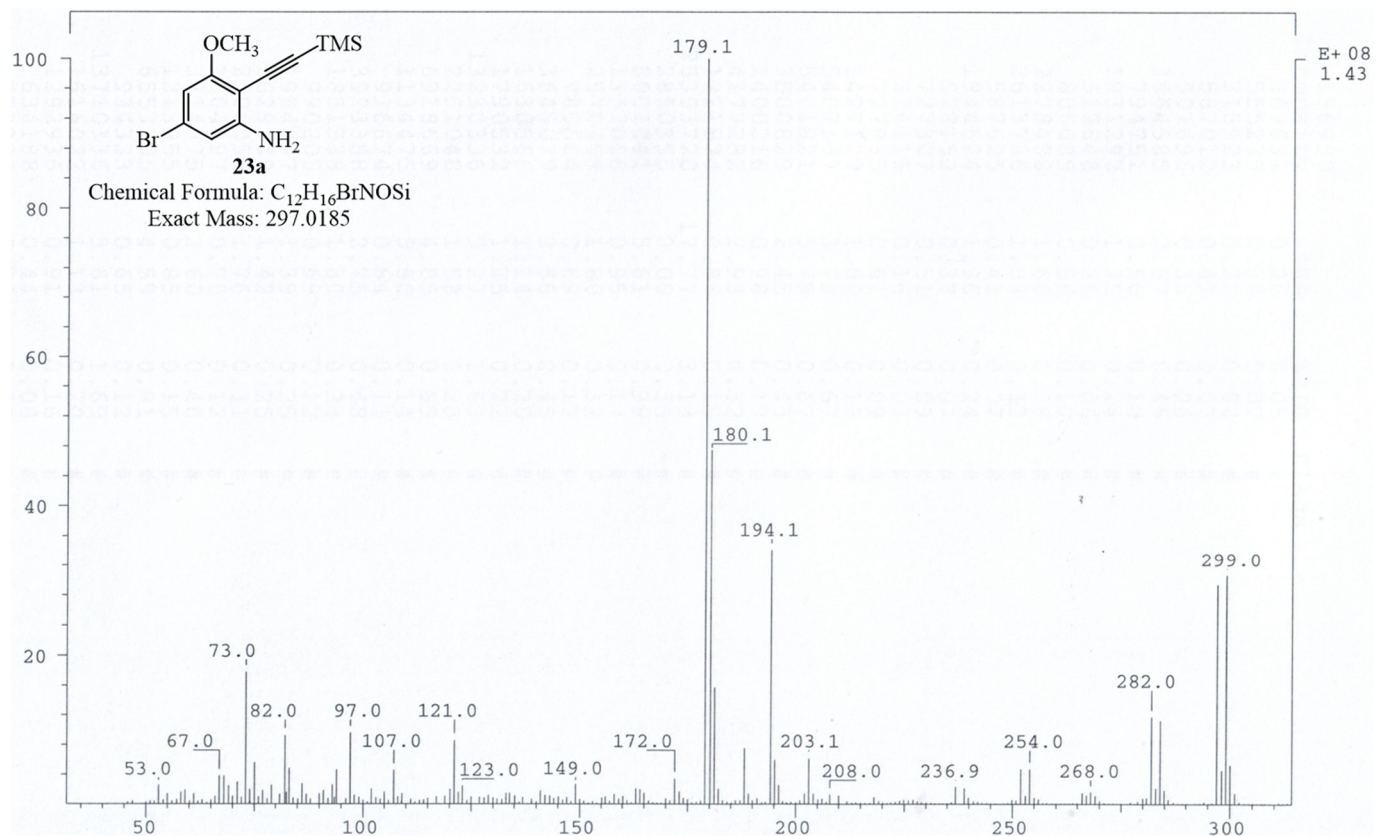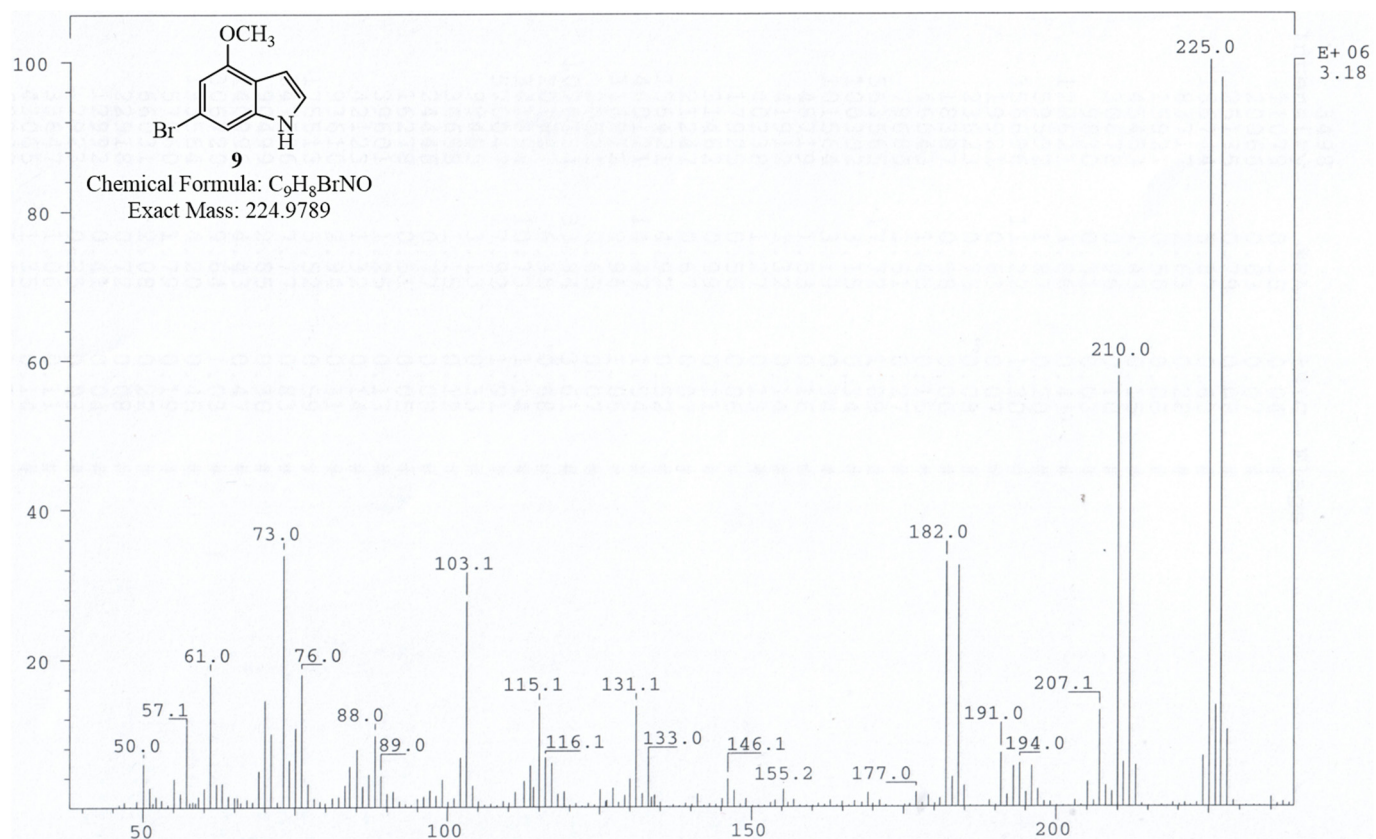



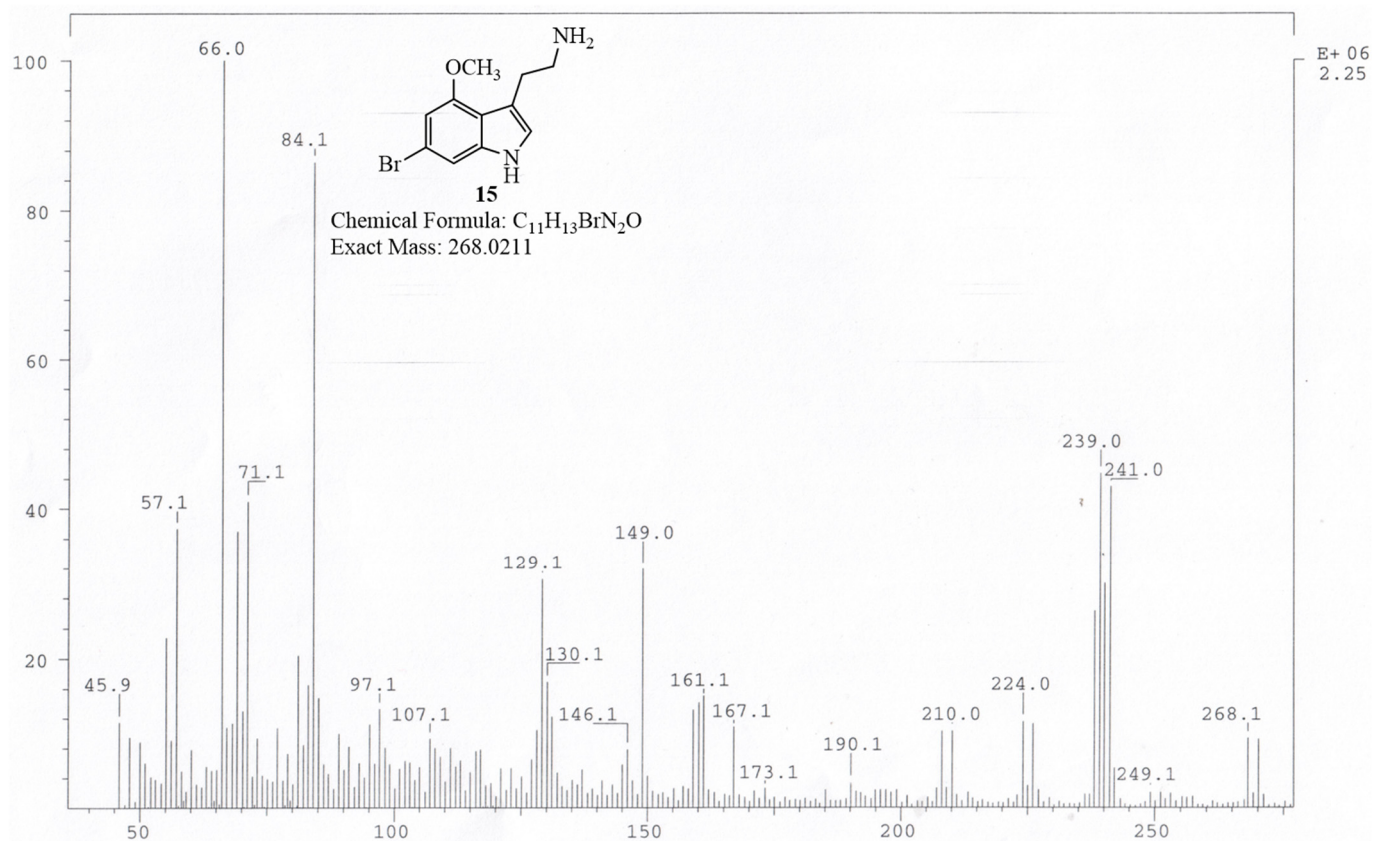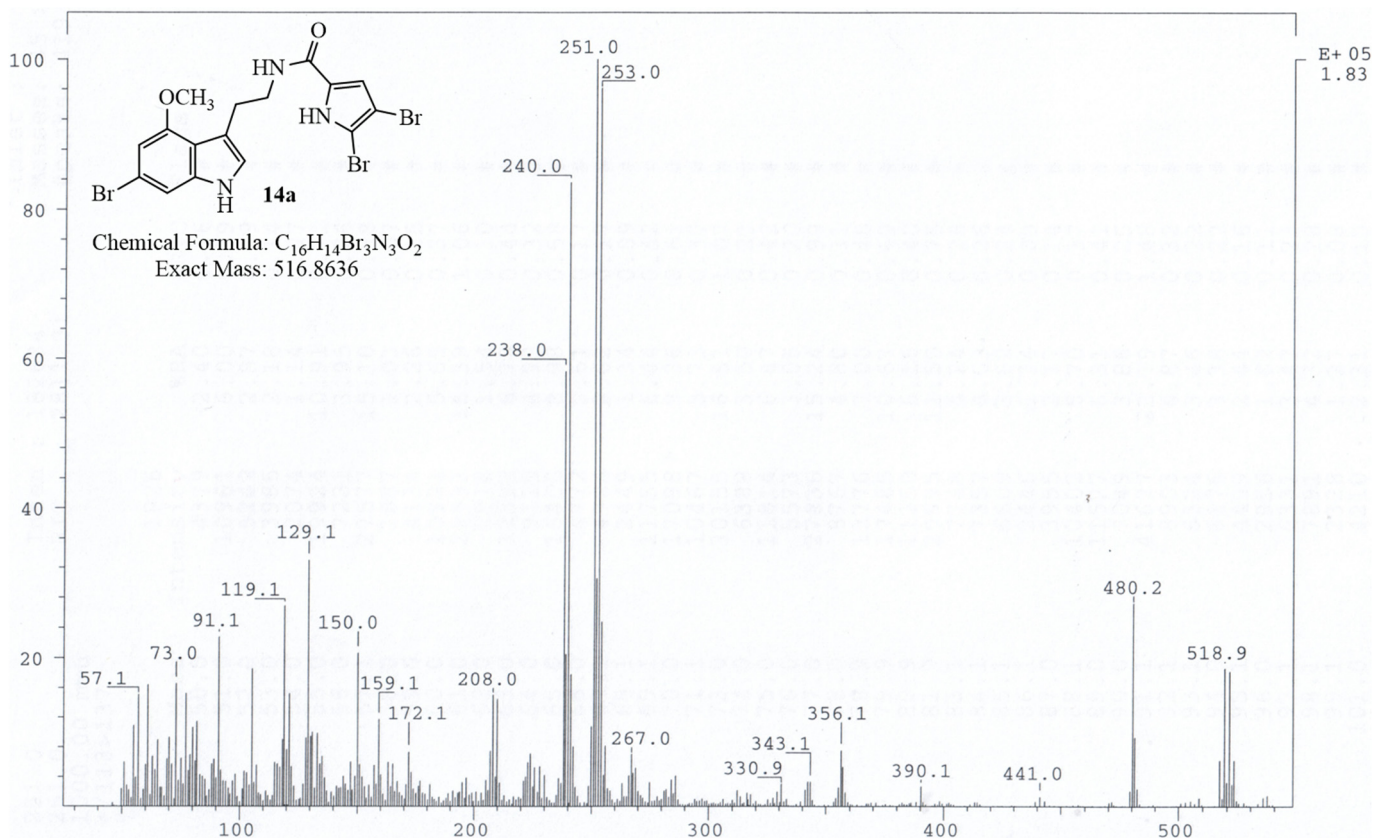



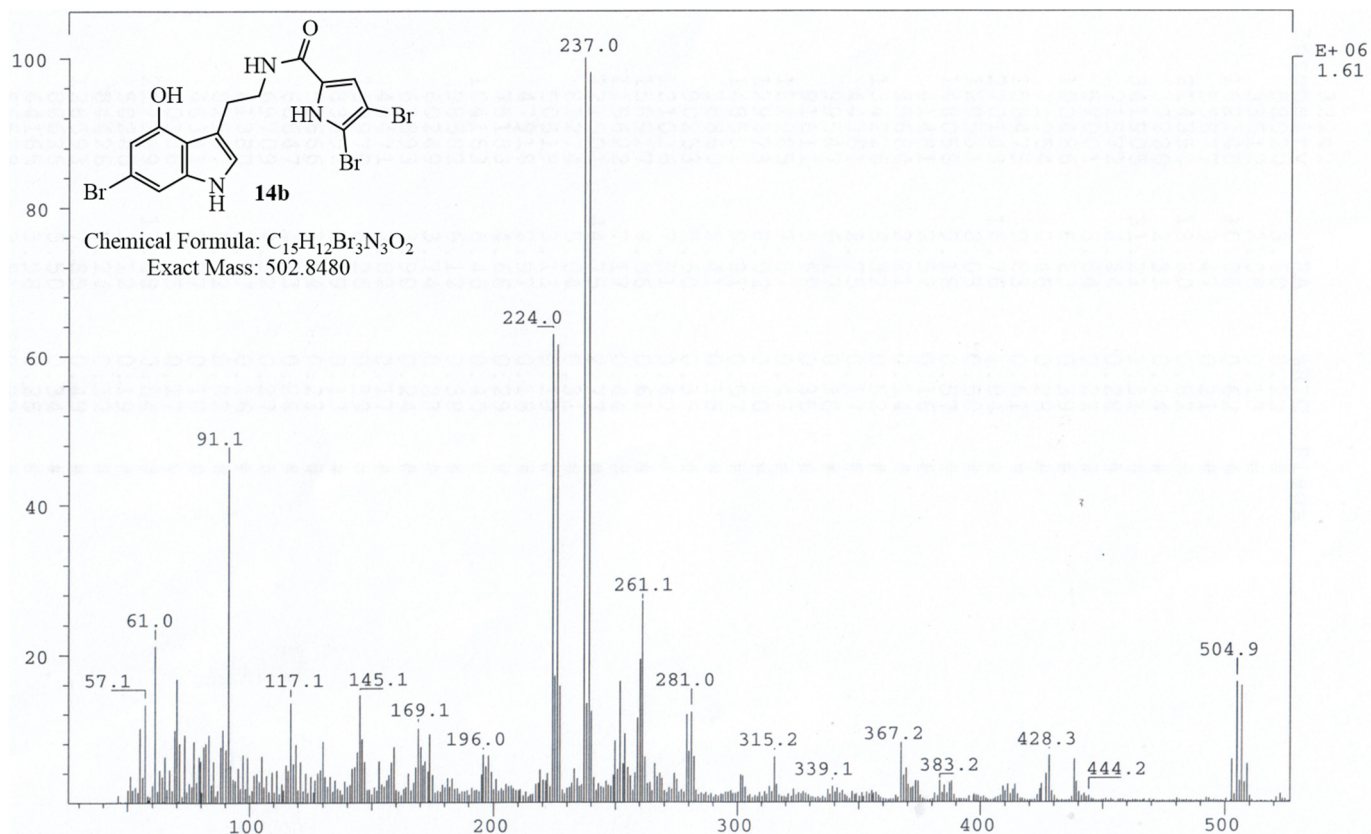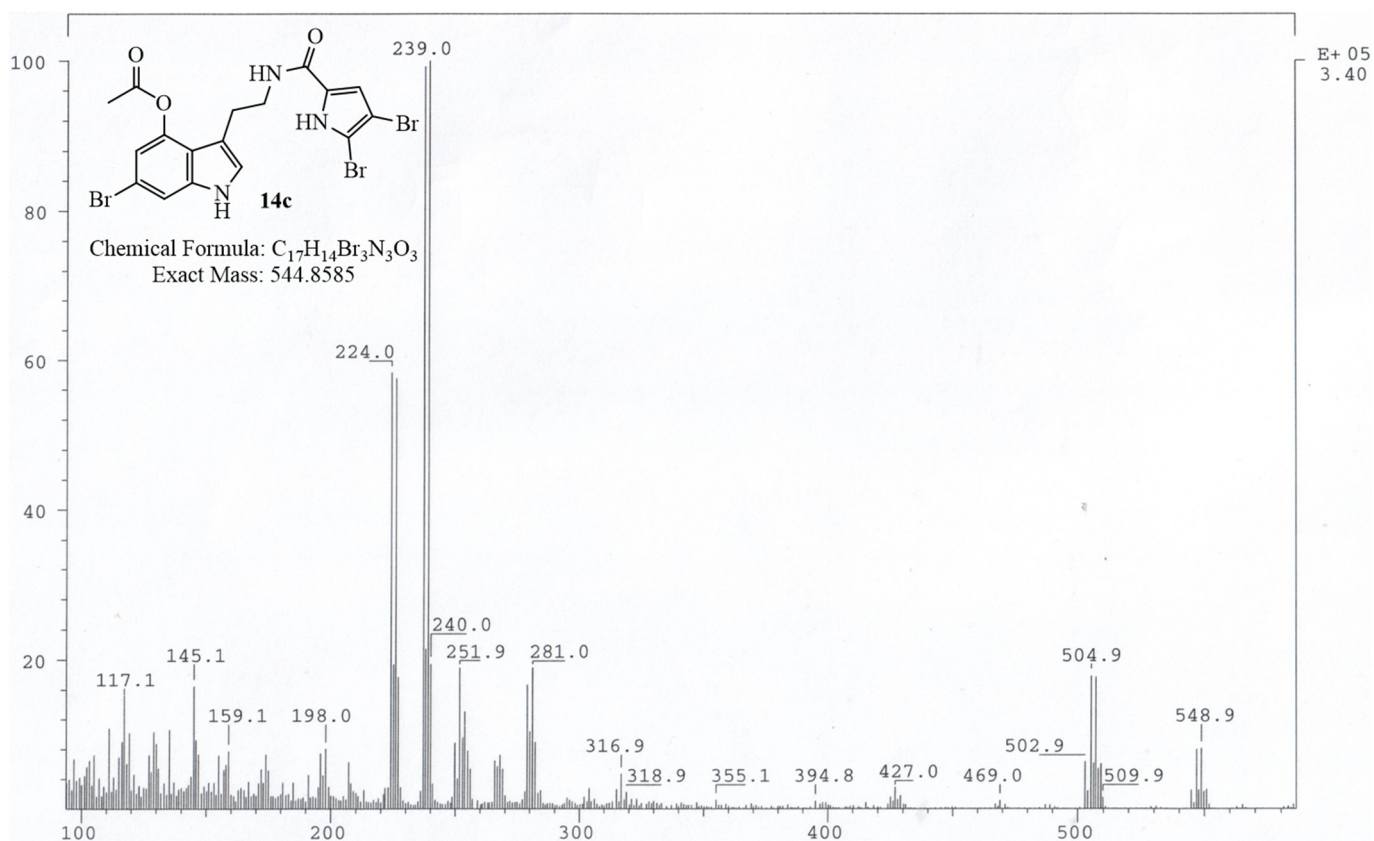

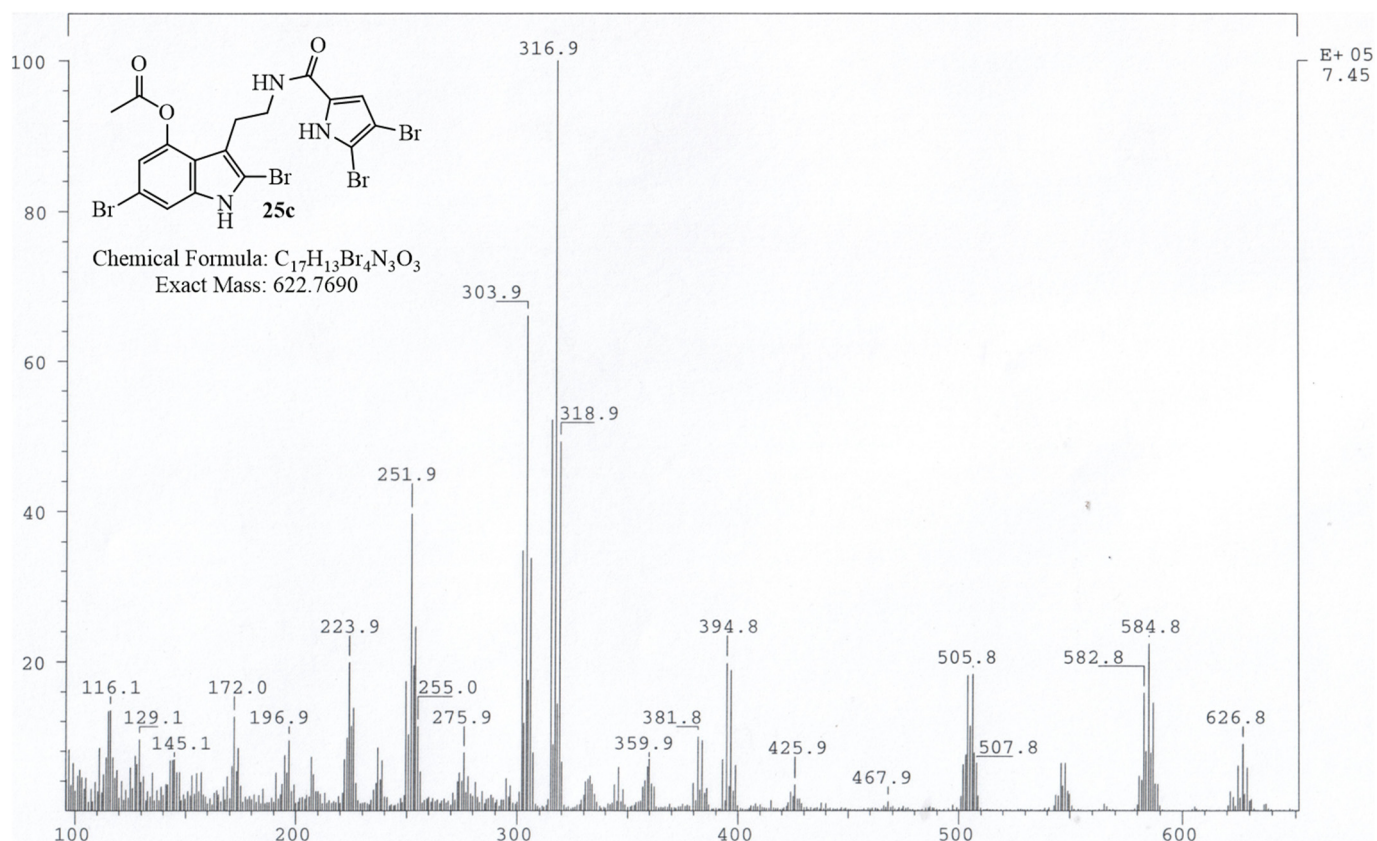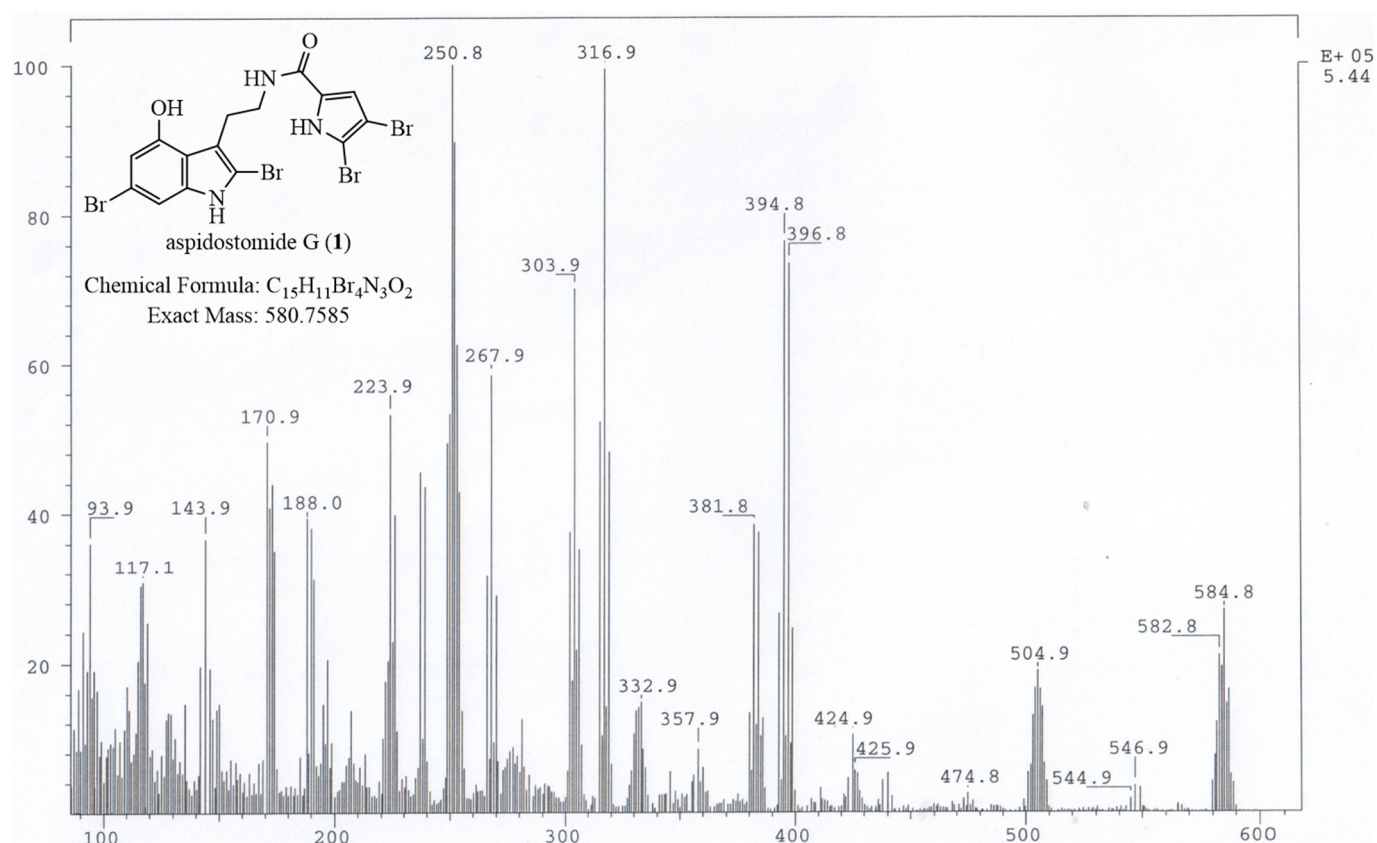



## D. NMR Spectra for the synthesized compounds

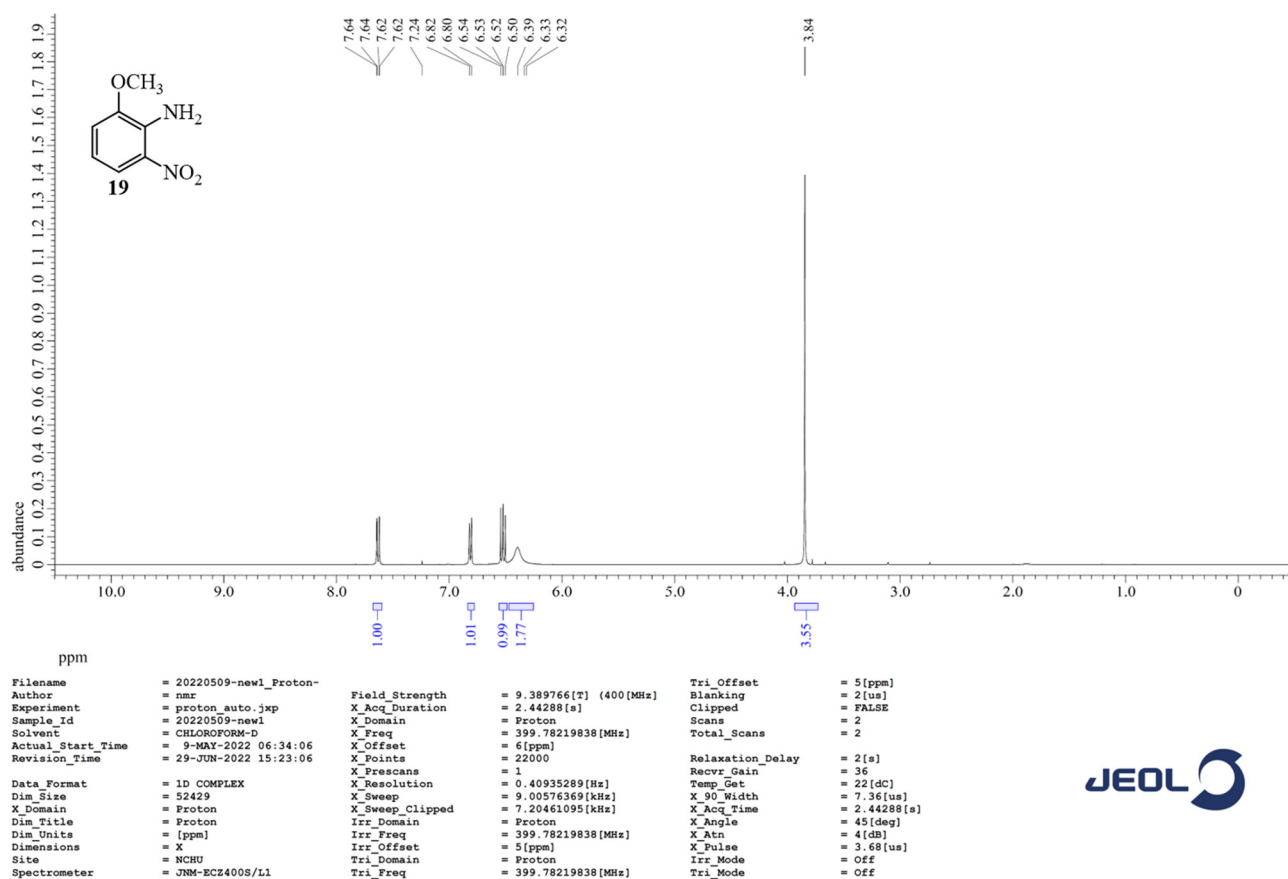<sup>1</sup>H NMR spectrum of compound 19 (400 MHz, CDCl<sub>3</sub>)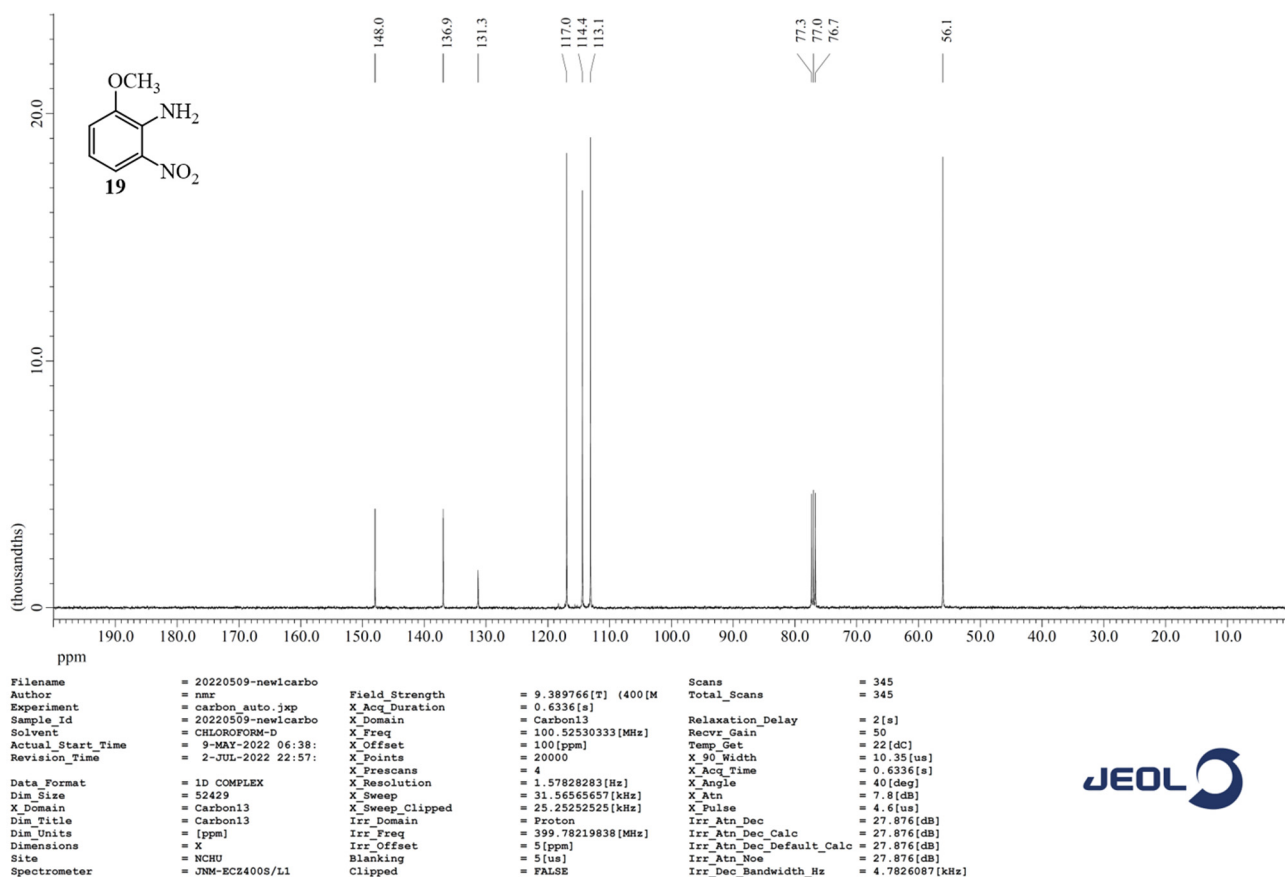<sup>13</sup>C NMR spectrum of compound 19 (100 MHz, CDCl<sub>3</sub>)

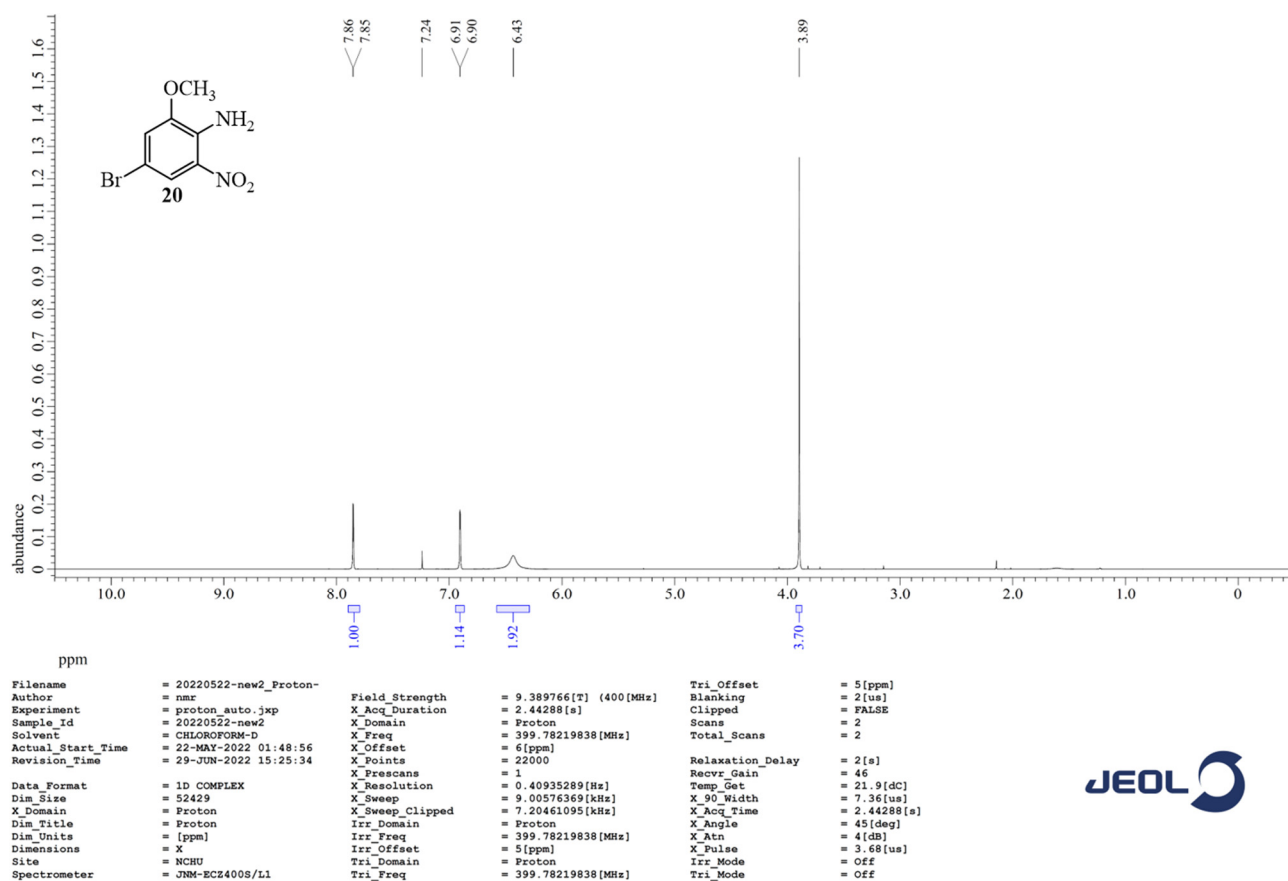<sup>1</sup>H NMR spectrum of compound **20** (400 MHz, CDCl<sub>3</sub>)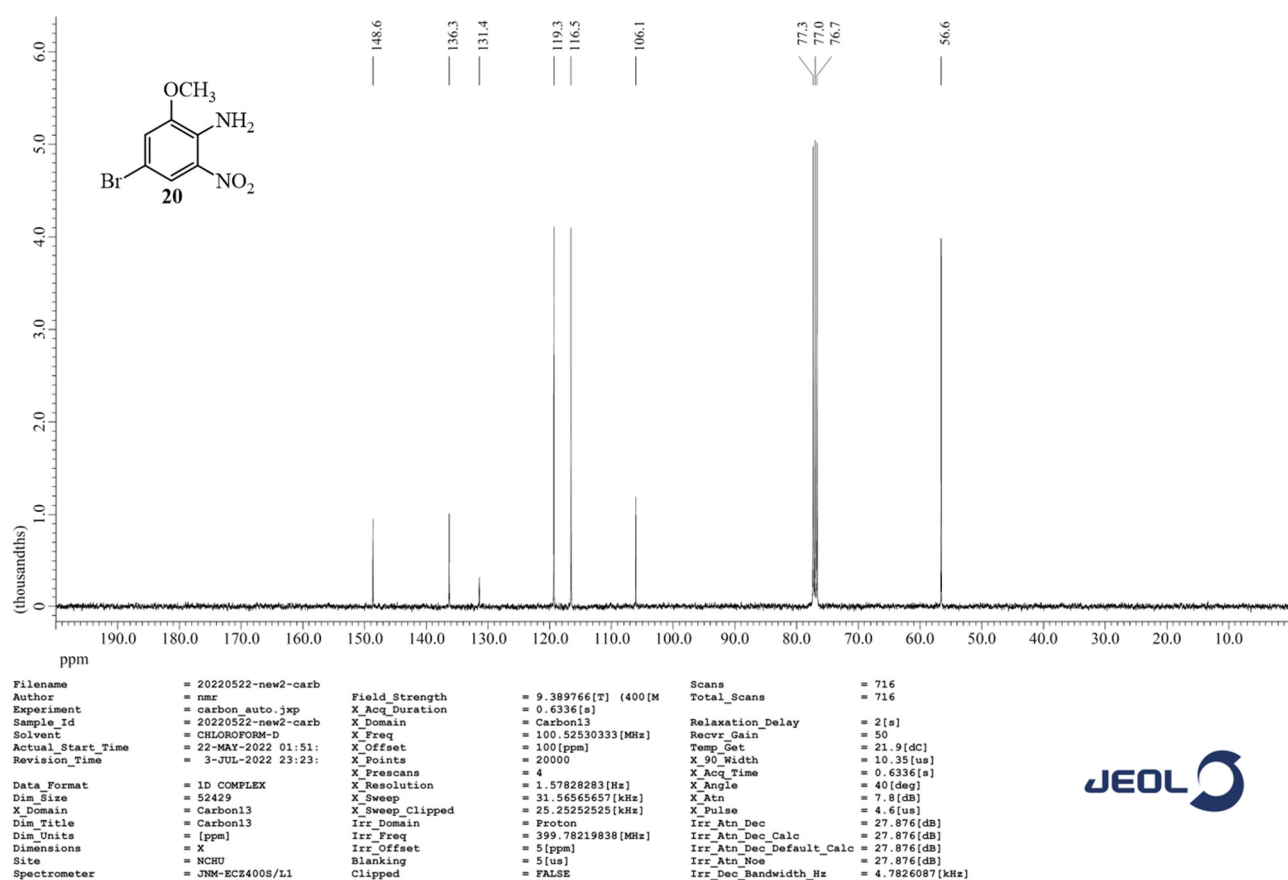<sup>13</sup>C NMR spectrum of compound **20** (100 MHz, CDCl<sub>3</sub>)

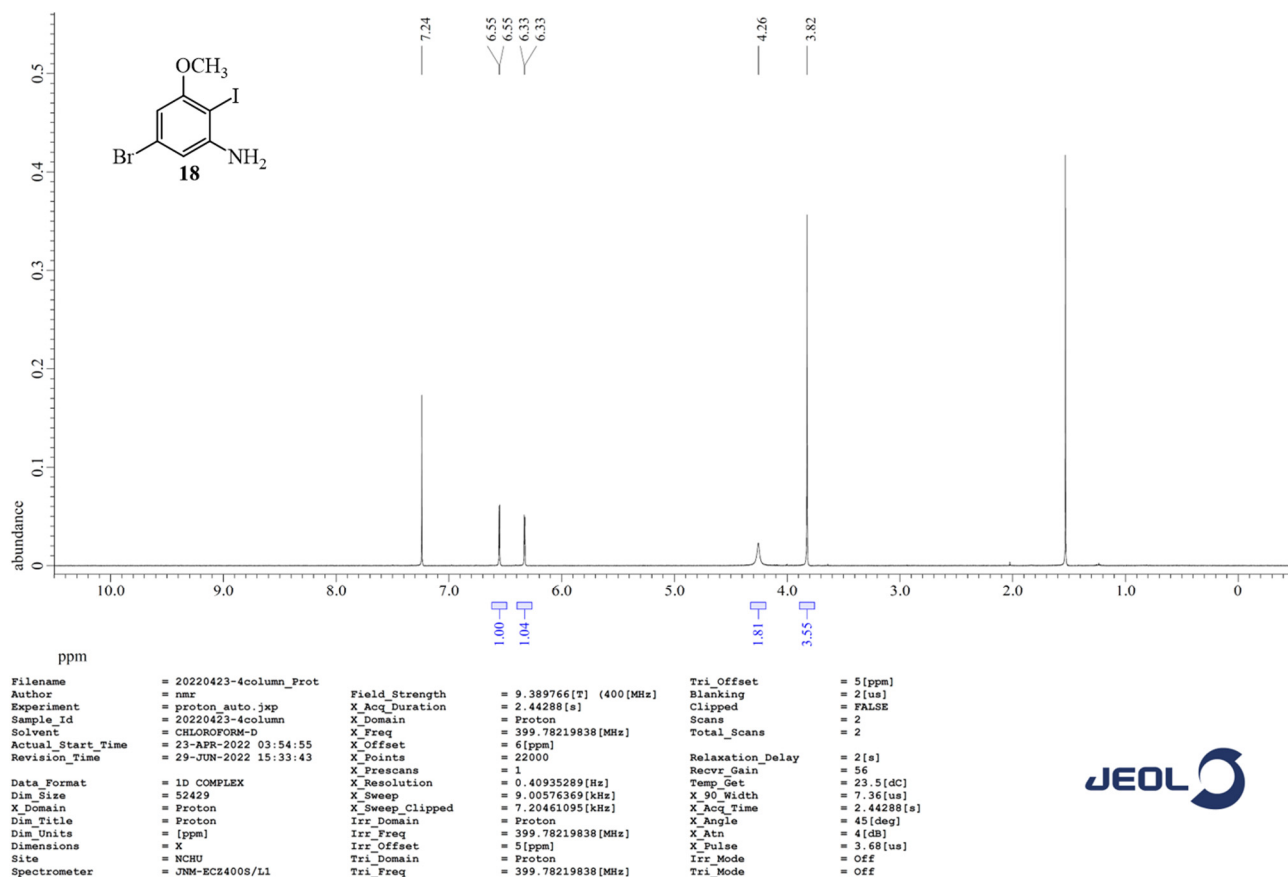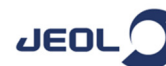
<sup>1</sup>H NMR spectrum of compound **18** (400 MHz, CDCl<sub>3</sub>)
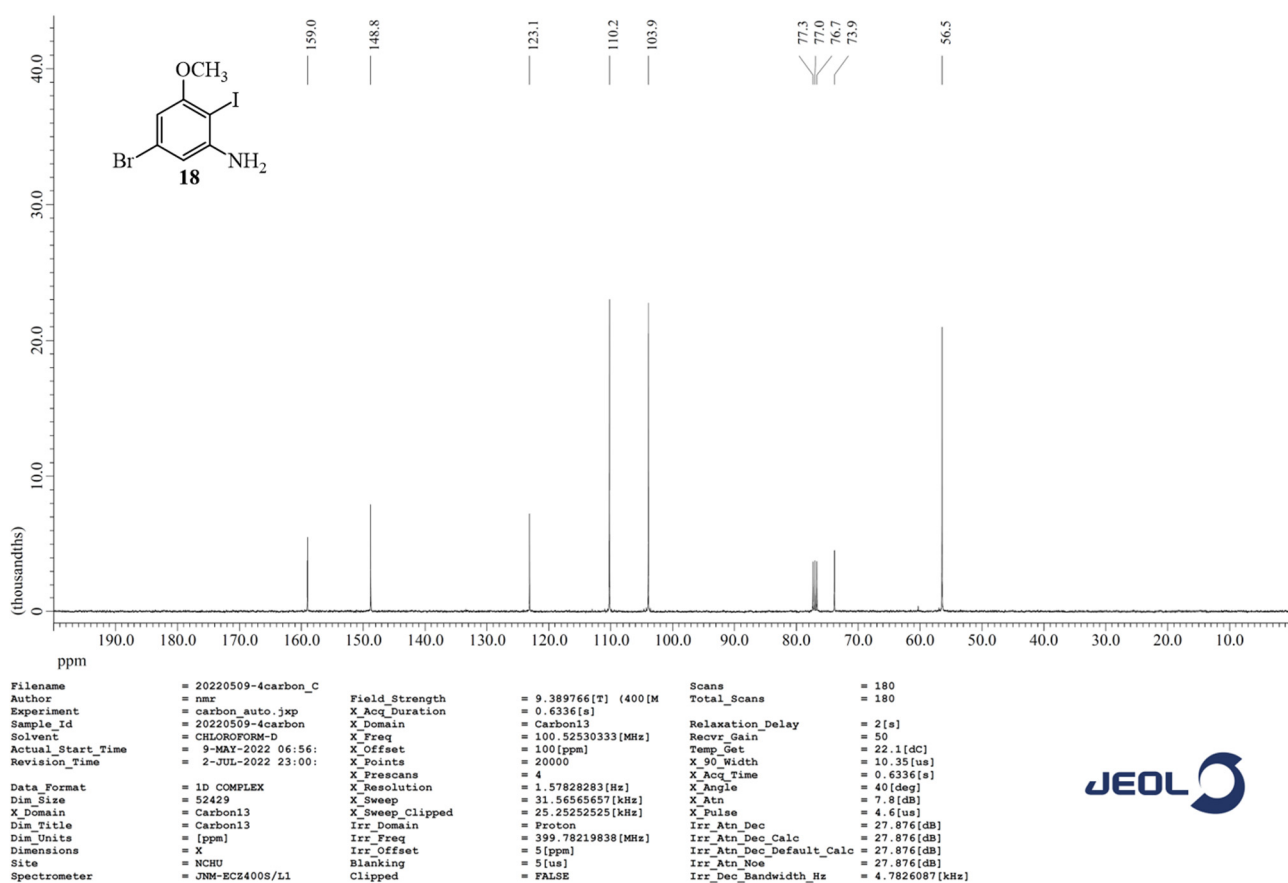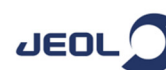
<sup>13</sup>C NMR spectrum of compound **18** (100 MHz, CDCl<sub>3</sub>)

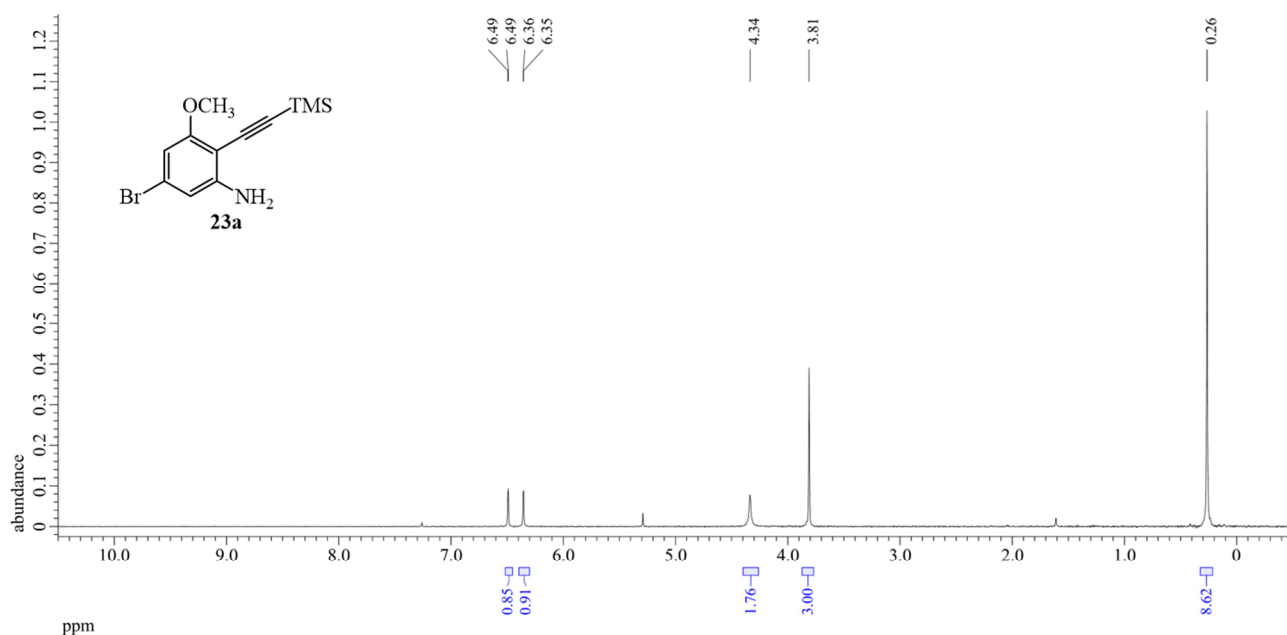

|                   |                                  |                |              |                      |
|-------------------|----------------------------------|----------------|--------------|----------------------|
| Filename          | = H5-column-2-p372_protDim_Units | = [ppm]        | X_Resolution | = 0.4173344 [Hz]     |
| Author            | = nmr                            | Dimensions     | X_Sweep      | = 10.01602564 [kHz]  |
| Experiment        | = proton.jxp                     | Site           | X_Sweep_Clip | = 8.01282051 [kHz]   |
| Sample_Id         | = H5-column-2-p372               | Spectrometer   | Irr_Domain   | = Proton             |
| Solvent           | = CHLOROFORM-D                   |                | Irr_Freq     | = 399.78219838 [MHz] |
| Actual_Start_Time | = 17-FEB-2023 12:53:09           | Field_Strength | Irr_Offset   | = 5 [ppm]            |
| Revision_Time     | = 18-FEB-2023 02:53:54           | X_Acq_Duration | Tri_Domain   | = Proton             |
|                   |                                  | X_Domain       | Tri_Freq     | = 399.78219838 [MHz] |
| Data_Format       | = 1D COMPLEX                     | X_Freq         | Tri_Offset   | = 5 [ppm]            |
| Dim_Size          | = 52429                          | X_Offset       | Blanking     | = 2 [us]             |
| X_Domain          | = Proton                         | X_Points       | Clipped      | = FALSE              |
| Dim_Title         | = Proton                         | X_Prescans     | Scans        | = 2                  |

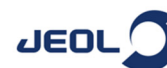

<sup>1</sup>H NMR spectrum of compound **23a** (400 MHz, CDCl<sub>3</sub>)

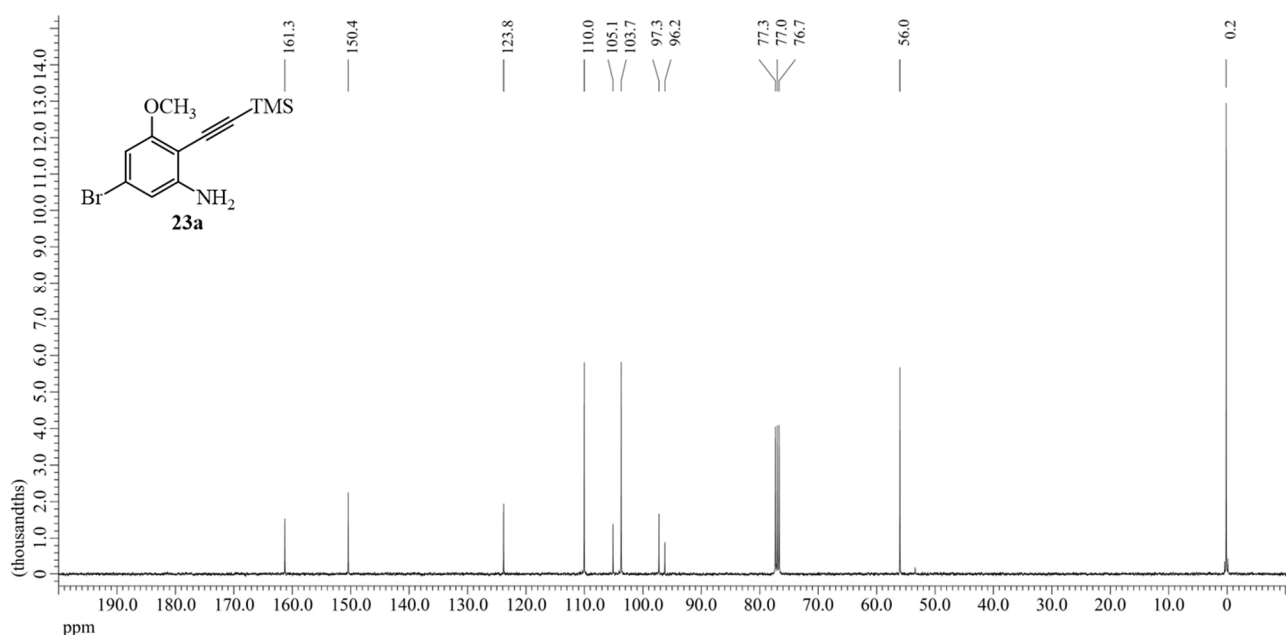

|                   |                               |                |                  |                      |
|-------------------|-------------------------------|----------------|------------------|----------------------|
| Filename          | = H5-column-2-p372-cDim_Units | = [ppm]        | X_Resolution     | = 1.57828283 [Hz]    |
| Author            | = nmr                         | Dimensions     | X_Sweep          | = 31.56565657 [kHz]  |
| Experiment        | = carbon.jxp                  | Site           | X_Sweep_Clip     | = 25.25252525 [kHz]  |
| Sample_Id         | = H5-column-2-p372-c          | Spectrometer   | Irr_Domain       | = Proton             |
| Solvent           | = CHLOROFORM-D                |                | Irr_Freq         | = 399.78219838 [MHz] |
| Actual_Start_Time | = 17-FEB-2023 14:57           | Field_Strength | Irr_Offset       | = 5 [ppm]            |
| Revision_Time     | = 18-FEB-2023 02:59           | X_Acq_Duration | Tri_Domain       | = 5 [us]             |
|                   |                               | X_Domain       | Tri_Freq         | = 399.78219838 [MHz] |
| Data_Format       | = 1D COMPLEX                  | X_Freq         | Tri_Offset       | = 5 [ppm]            |
| Dim_Size          | = 52429                       | X_Offset       | Blanking         | = 2 [us]             |
| X_Domain          | = Carbon13                    | X_Points       | Clipped          | = FALSE              |
| Dim_Title         | = Carbon13                    | X_Prescans     | Scans            | = 542                |
|                   |                               |                | Total_Scans      | = 542                |
|                   |                               |                | Relaxation_Delay | = 2 [s]              |

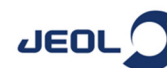

<sup>13</sup>C NMR spectrum of compound **23a** (100 MHz, CDCl<sub>3</sub>)

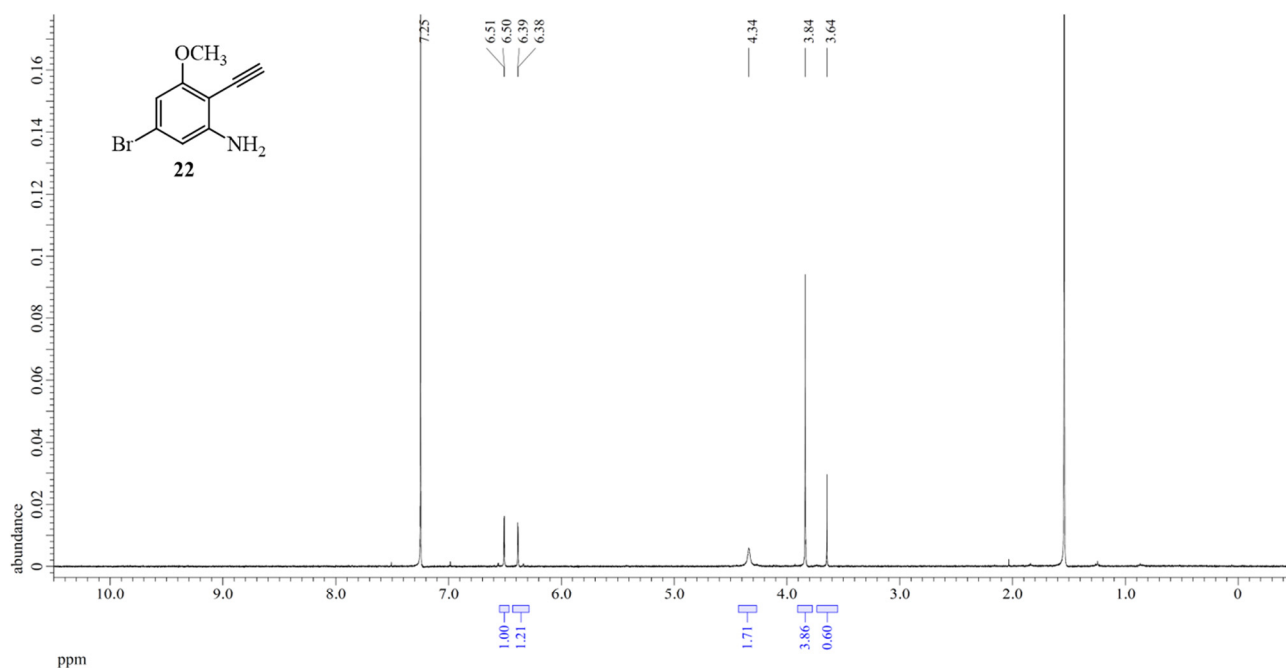

|                   |                         |                 |                          |                  |              |
|-------------------|-------------------------|-----------------|--------------------------|------------------|--------------|
| Filename          | = 20220602-6column_Prot | Field_Strength  | = 9.389766[T] (400[MHz]) | Tri_Offset       | = 5[ppm]     |
| Author            | = nmr                   | X_Acq_Duration  | = 2.44288[s]             | Blanking         | = 2[us]      |
| Experiment        | = proton_auto.jpg       | X_Domain        | = Proton                 | Clipped          | = FALSE      |
| Sample_Id         | = 20220602-6column      | X_Freq          | = 399.78219838[MHz]      | Scans            | = 2          |
| Solvent           | = CHLOROFORM-D          | X_Offset        | = 6[ppm]                 | Total_Scans      | = 2          |
| Actual_Start_Time | = 2-JUN-2022 06:58:20   | X_Points        | = 22000                  | Relaxation_Delay | = 2[s]       |
| Revision_Time     | = 29-JUN-2022 15:36:50  | X_Frescans      | = 1                      | Recvr_Gain       | = 56         |
| Data_Format       | = 1D COMPLEX            | X_Resolution    | = 0.40935289[Hz]         | Temp_Get         | = 22.4[dc]   |
| Dim_Size          | = 52429                 | X_Sweep         | = 9.00576369[kHz]        | X_90_Width       | = 7.36[us]   |
| X_Domain          | = Proton                | X_Sweep_Clipped | = 7.20461095[kHz]        | X_Acq_Time       | = 2.44288[s] |
| Dim_Title         | = Proton                | Irr_Domain      | = Proton                 | X_Angle          | = 45[deg]    |
| Dim_Units         | = [ppm]                 | Irr_Freq        | = 399.78219838[MHz]      | X_Atn            | = 4[db]      |
| Dimensions        | = X                     | Irr_Offset      | = 5[ppm]                 | X_Pulse          | = 3.68[us]   |
| Site              | = NCHU                  | Tri_Domain      | = Proton                 | Irr_Mode         | = Off        |
| Spectrometer      | = JNM-ECZ400S/L1        | Tri_Freq        | = 399.78219838[MHz]      | Tri_Mode         | = Off        |

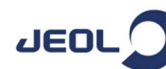

<sup>1</sup>H NMR spectrum of compound **22** (400 MHz, CDCl<sub>3</sub>)

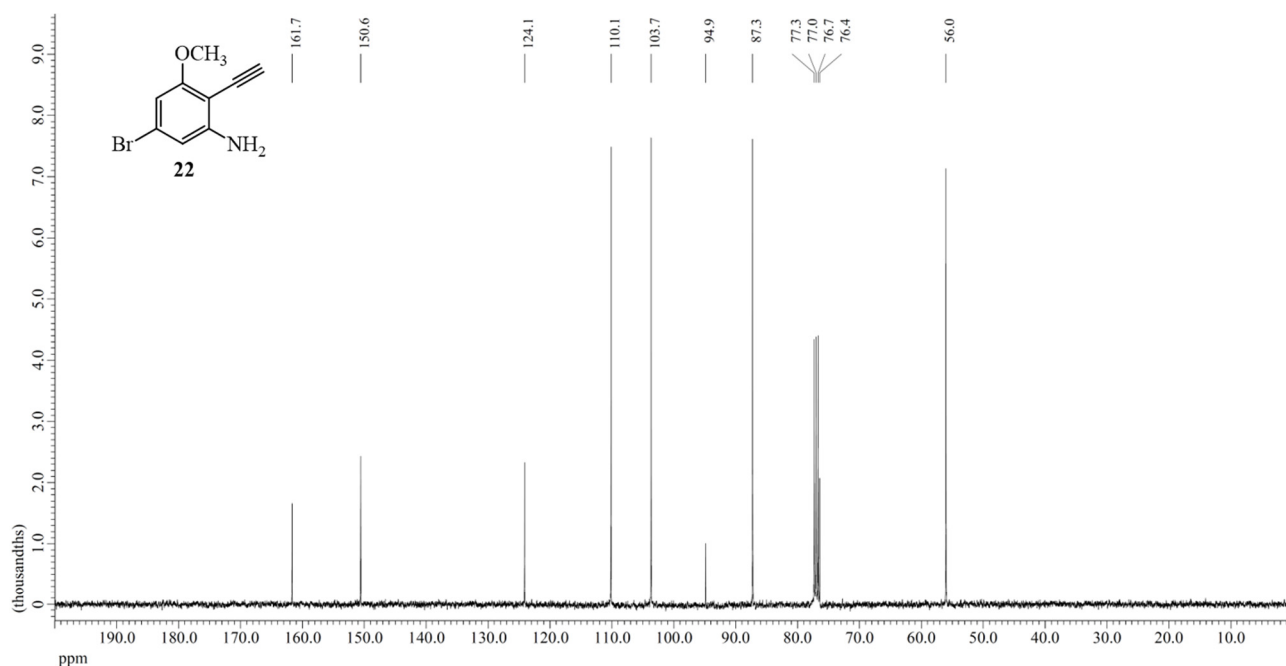

|                   |                      |                 |                          |                          |                  |
|-------------------|----------------------|-----------------|--------------------------|--------------------------|------------------|
| Filename          | = 6-column_Carbon-1- | Field_Strength  | = 9.389766[T] (400[MHz]) | Scans                    | = 242            |
| Author            | = nmr                | X_Acq_Duration  | = 0.6336[s]              | Total_Scans              | = 242            |
| Experiment        | = carbon_auto.jpg    | X_Domain        | = Carbon13               | Relaxation_Delay         | = 2[s]           |
| Sample_Id         | = 6-column           | X_Freq          | = 100.52530333[MHz]      | Recvr_Gain               | = 50             |
| Solvent           | = CHLOROFORM-D       | X_Offset        | = 100[ppm]               | Temp_Get                 | = 22.9[dc]       |
| Actual_Start_Time | = 14-JUN-2022 06:05: | X_Points        | = 20000                  | X_90_Width               | = 10.35[us]      |
| Revision_Time     | = 2-JUL-2022 23:13:  | X_Frescans      | = 4                      | X_Acq_Time               | = 0.6336[s]      |
| Data_Format       | = 1D COMPLEX         | X_Resolution    | = 1.57828283[Hz]         | X_Angle                  | = 40[deg]        |
| Dim_Size          | = 52429              | X_Sweep         | = 31.56565657[kHz]       | X_Atn                    | = 7.8[db]        |
| X_Domain          | = Carbon13           | X_Sweep_Clipped | = 25.25252525[kHz]       | X_Pulse                  | = 4.6[us]        |
| Dim_Title         | = Carbon13           | Irr_Domain      | = Proton                 | Irr_Atn_Dec              | = 27.876[db]     |
| Dim_Units         | = [ppm]              | Irr_Freq        | = 399.78219838[MHz]      | Irr_Atn_Dec_Calc         | = 27.876[db]     |
| Dimensions        | = X                  | Irr_Offset      | = 5[ppm]                 | Irr_Atn_Dec_Default_Calc | = 27.876[db]     |
| Site              | = NCHU               | Blanking        | = 5[us]                  | Irr_Atn_Noise            | = 27.876[db]     |
| Spectrometer      | = JNM-ECZ400S/L1     | Clipped         | = FALSE                  | Irr_Dec_Bandwidth_Hz     | = 4.7826087[kHz] |

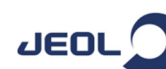

<sup>13</sup>C NMR spectrum of compound **22** (100 MHz, CDCl<sub>3</sub>)

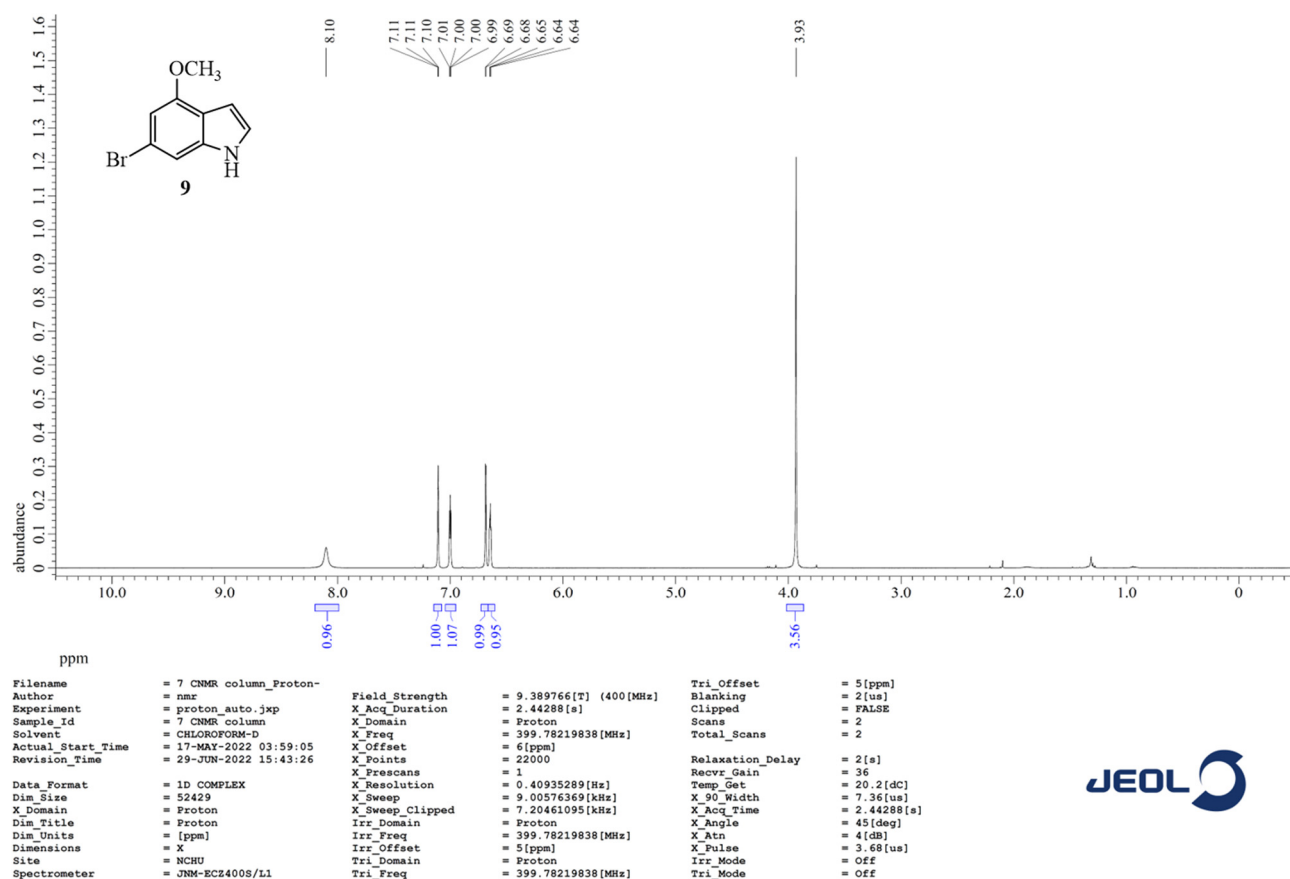

JEOL

<sup>1</sup>H NMR spectrum of compound 9 (400 MHz, CDCl<sub>3</sub>)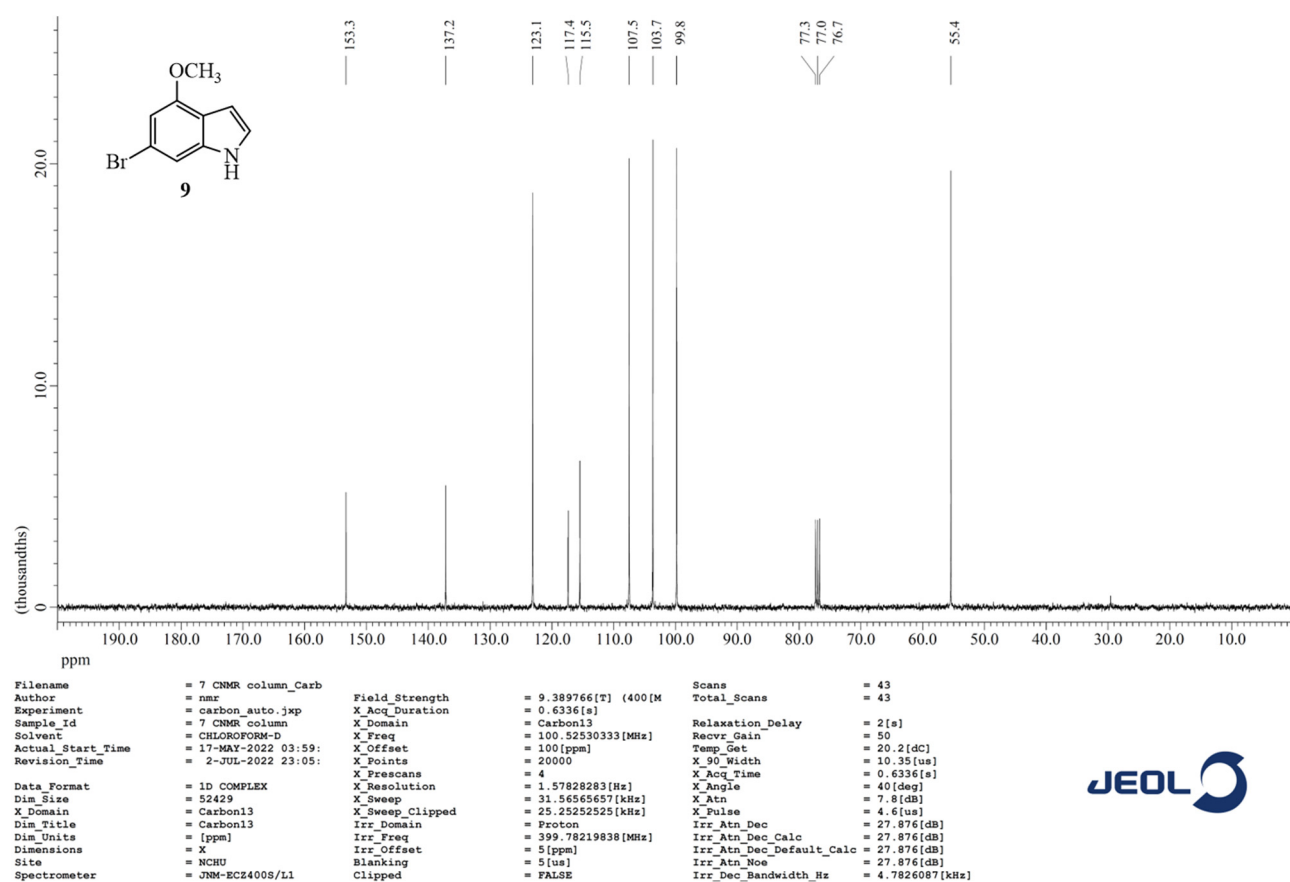

JEOL

<sup>13</sup>C NMR spectrum of compound 9 (100 MHz, CDCl<sub>3</sub>)



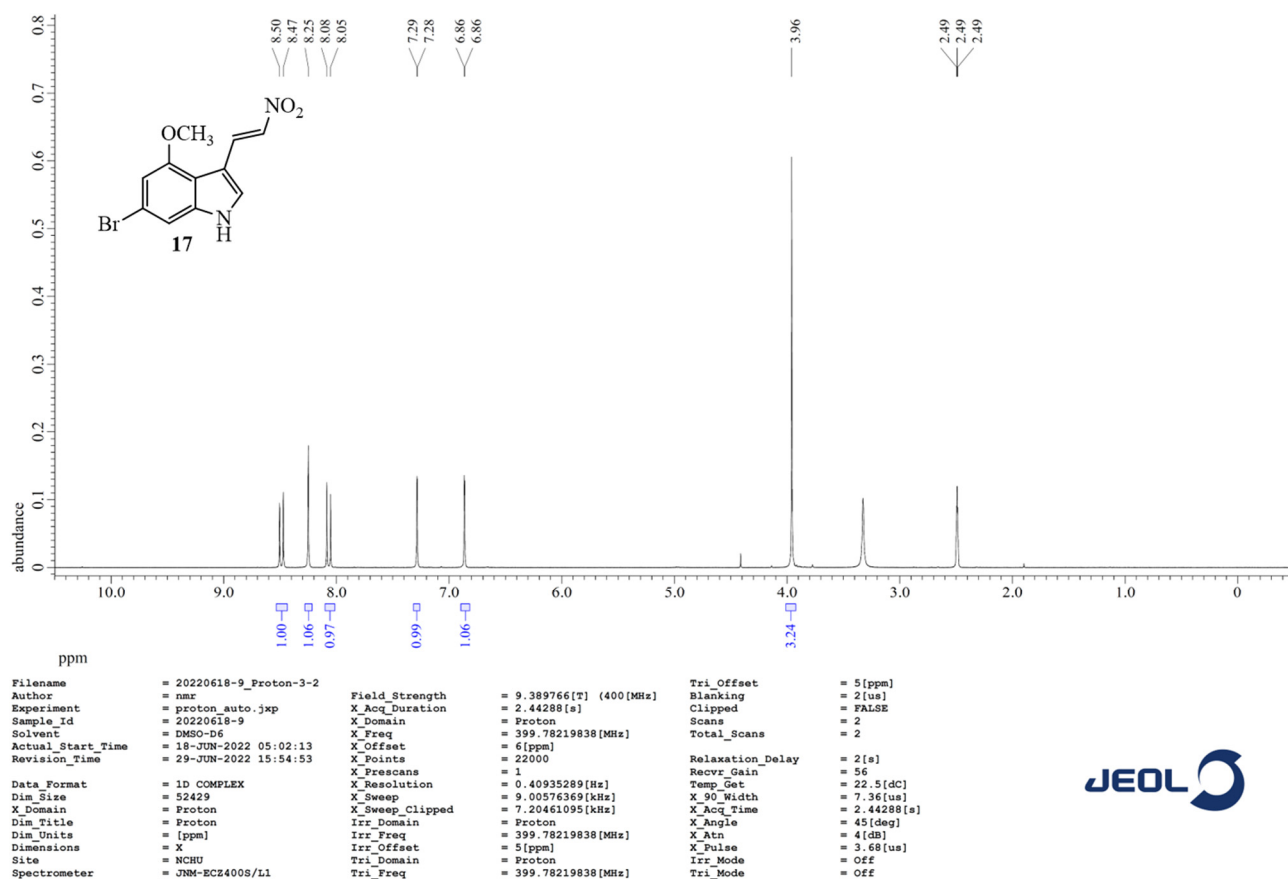

JEOL

<sup>1</sup>H NMR spectrum of compound 17 (400 MHz, DMSO-*d*<sub>6</sub>)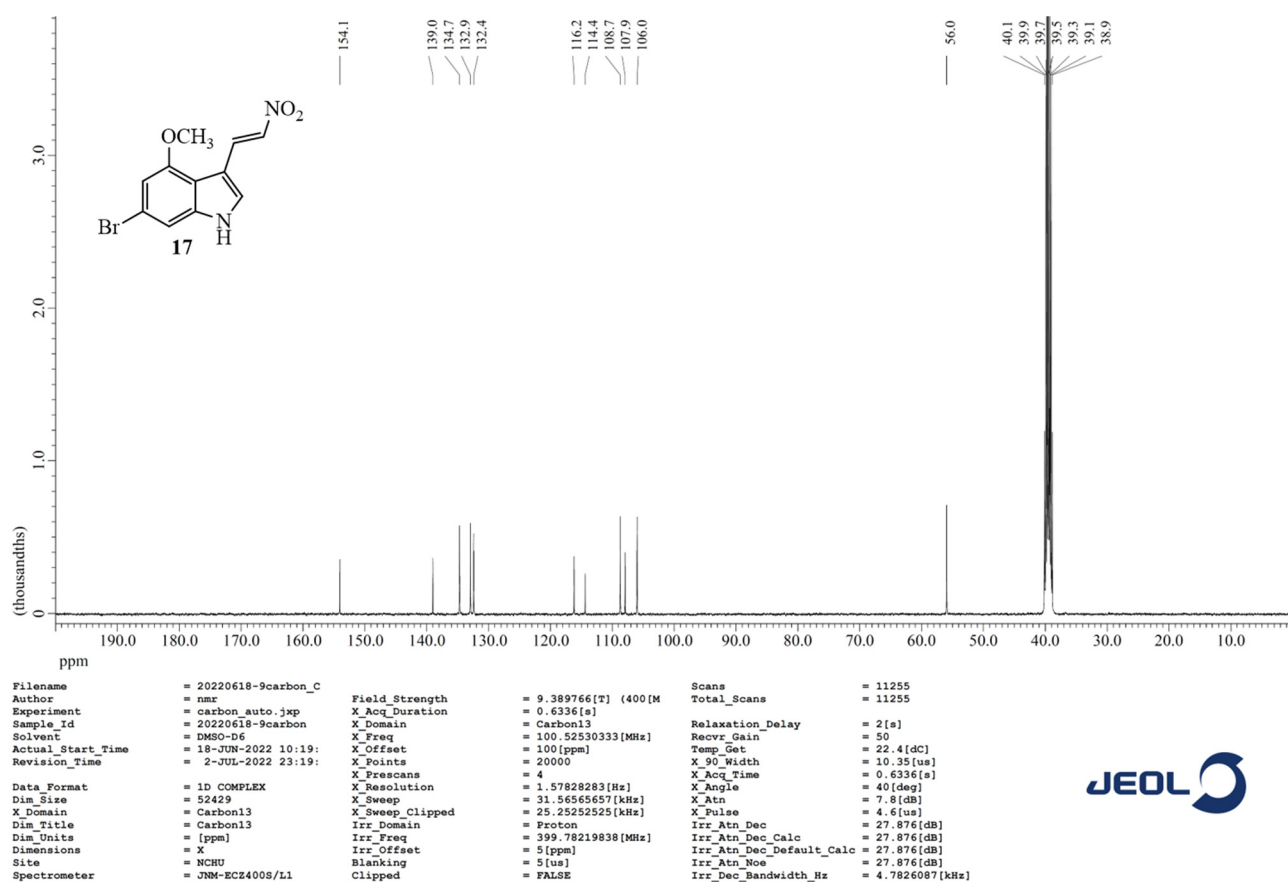

JEOL

<sup>13</sup>C NMR spectrum of compound 17 (100 MHz, DMSO-*d*<sub>6</sub>)

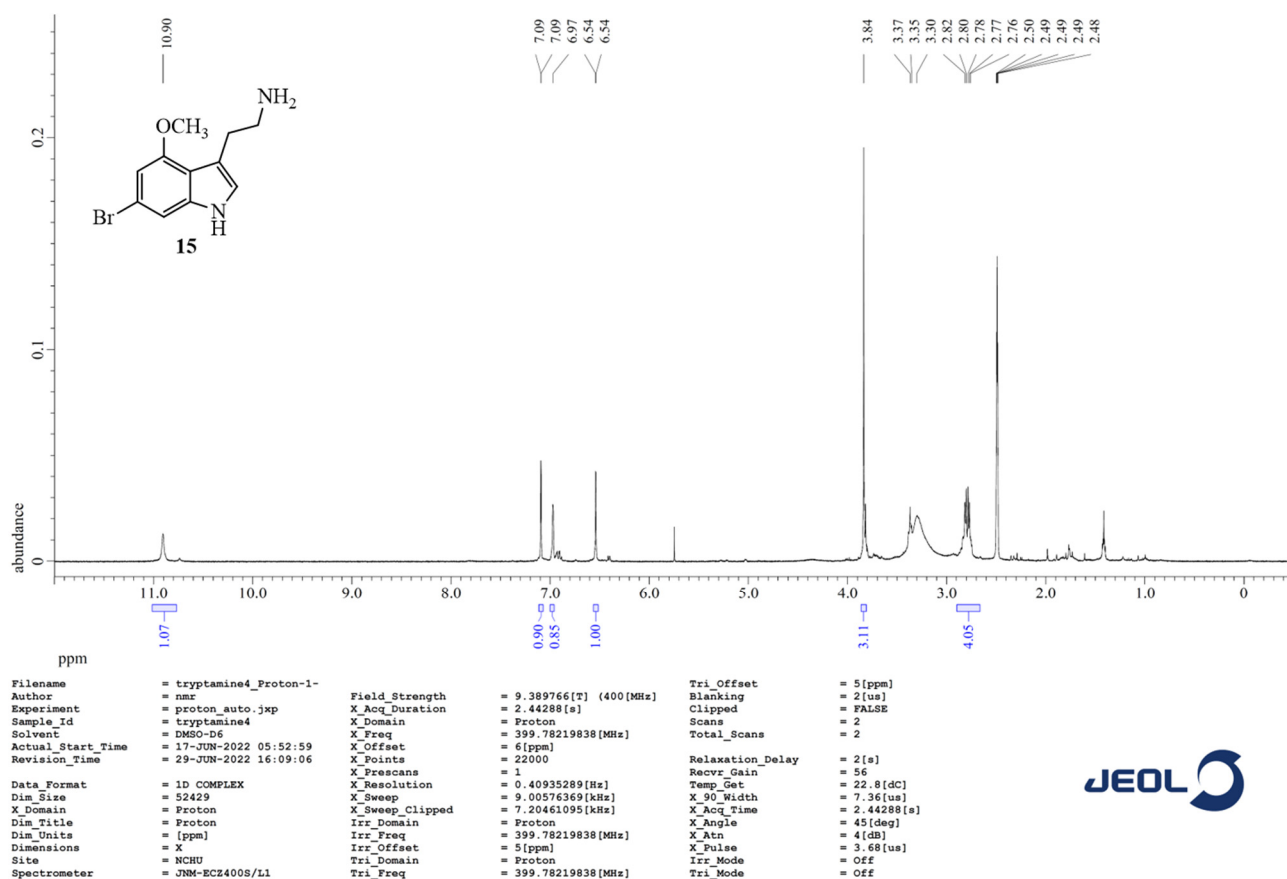<sup>1</sup>H NMR spectrum of compound 15 (400 MHz, DMSO-*d*<sub>6</sub>)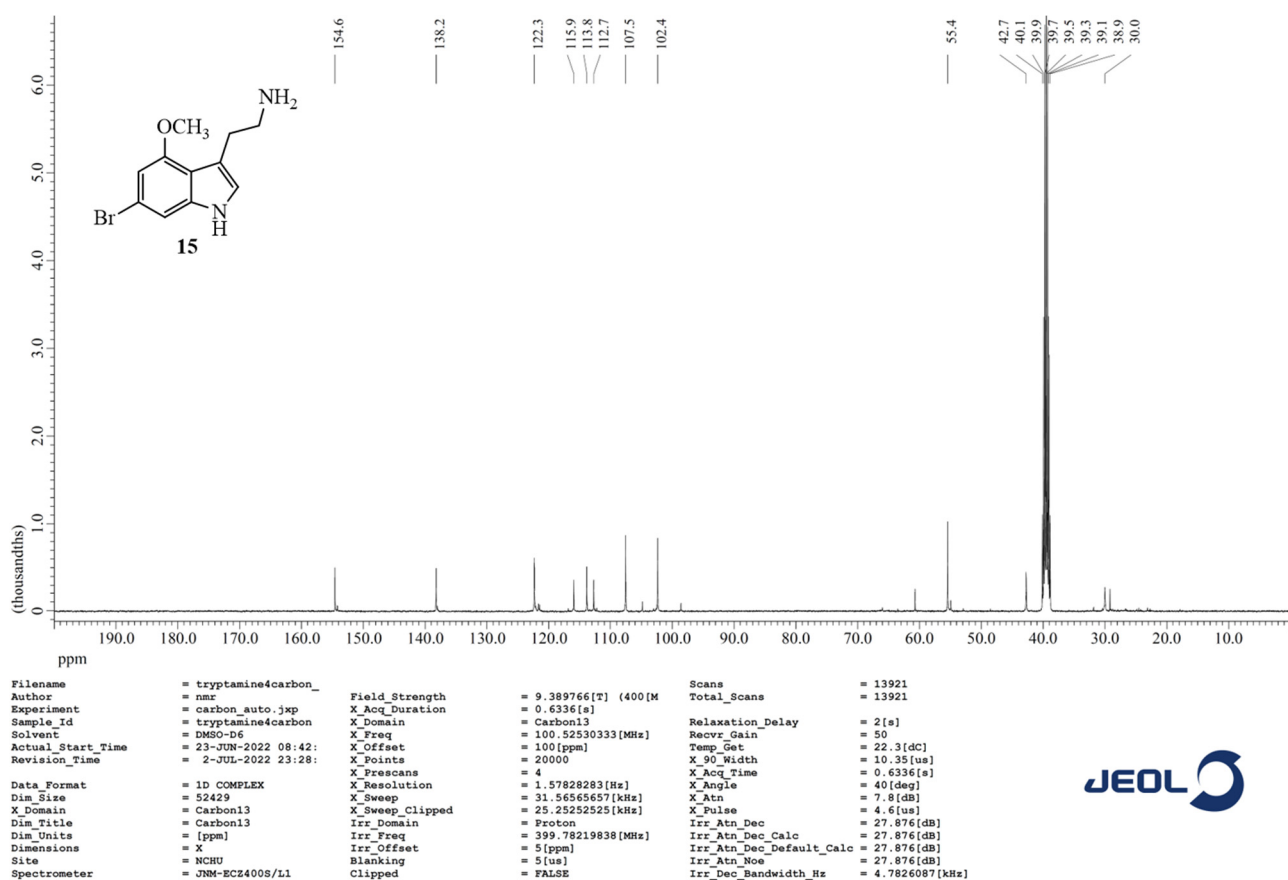<sup>13</sup>C NMR spectrum of compound 15 (100 MHz, DMSO-*d*<sub>6</sub>)

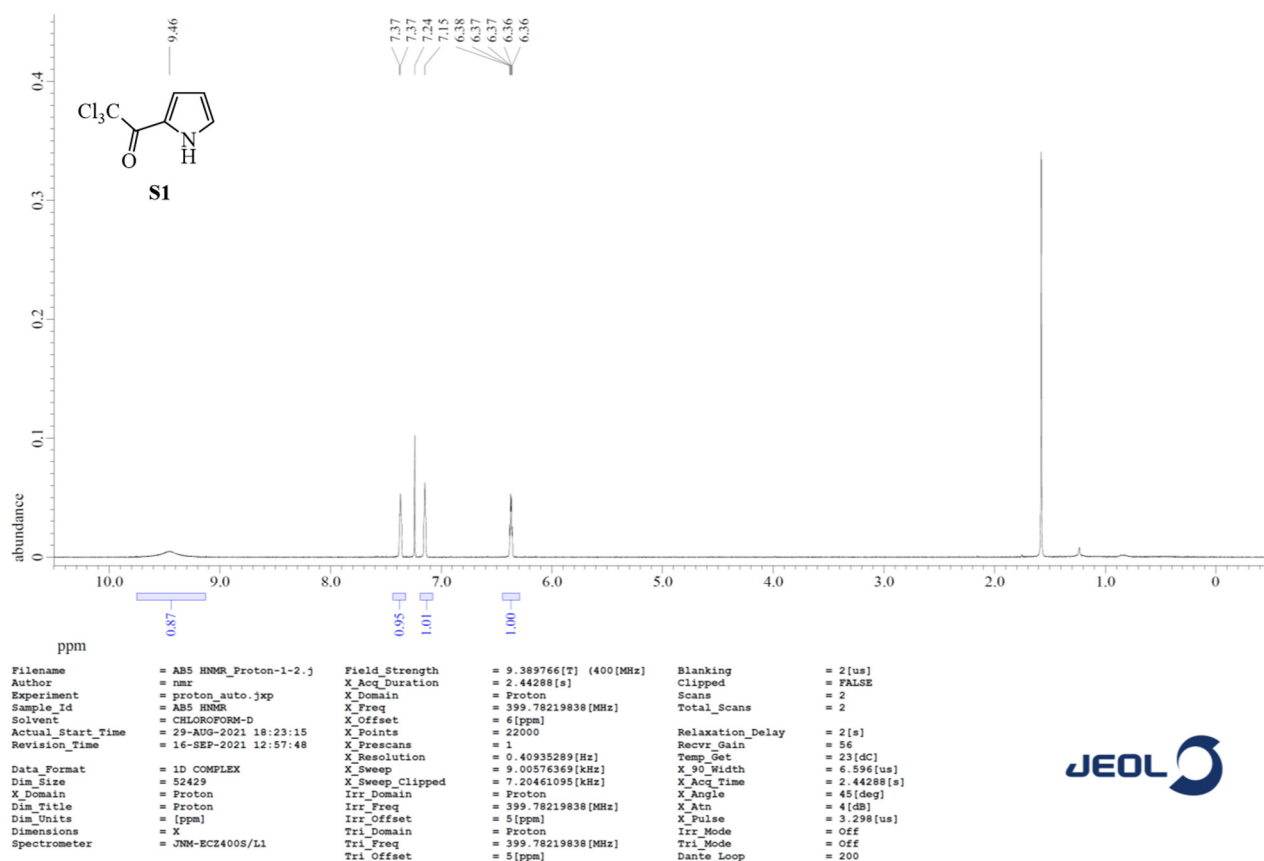<sup>1</sup>H NMR spectrum of compound **S1** (400 MHz, CDCl<sub>3</sub>)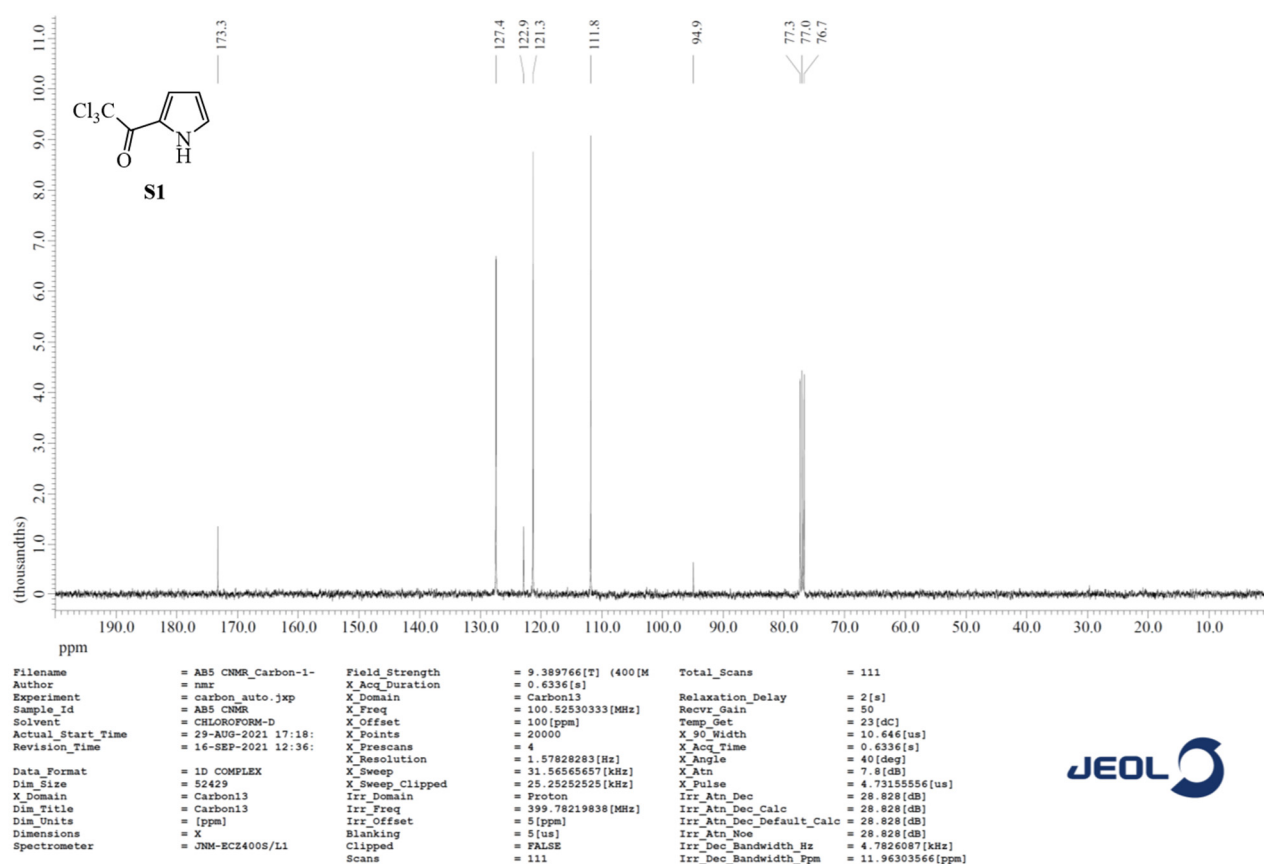<sup>13</sup>C NMR spectrum of compound **S1** (100 MHz, CDCl<sub>3</sub>)

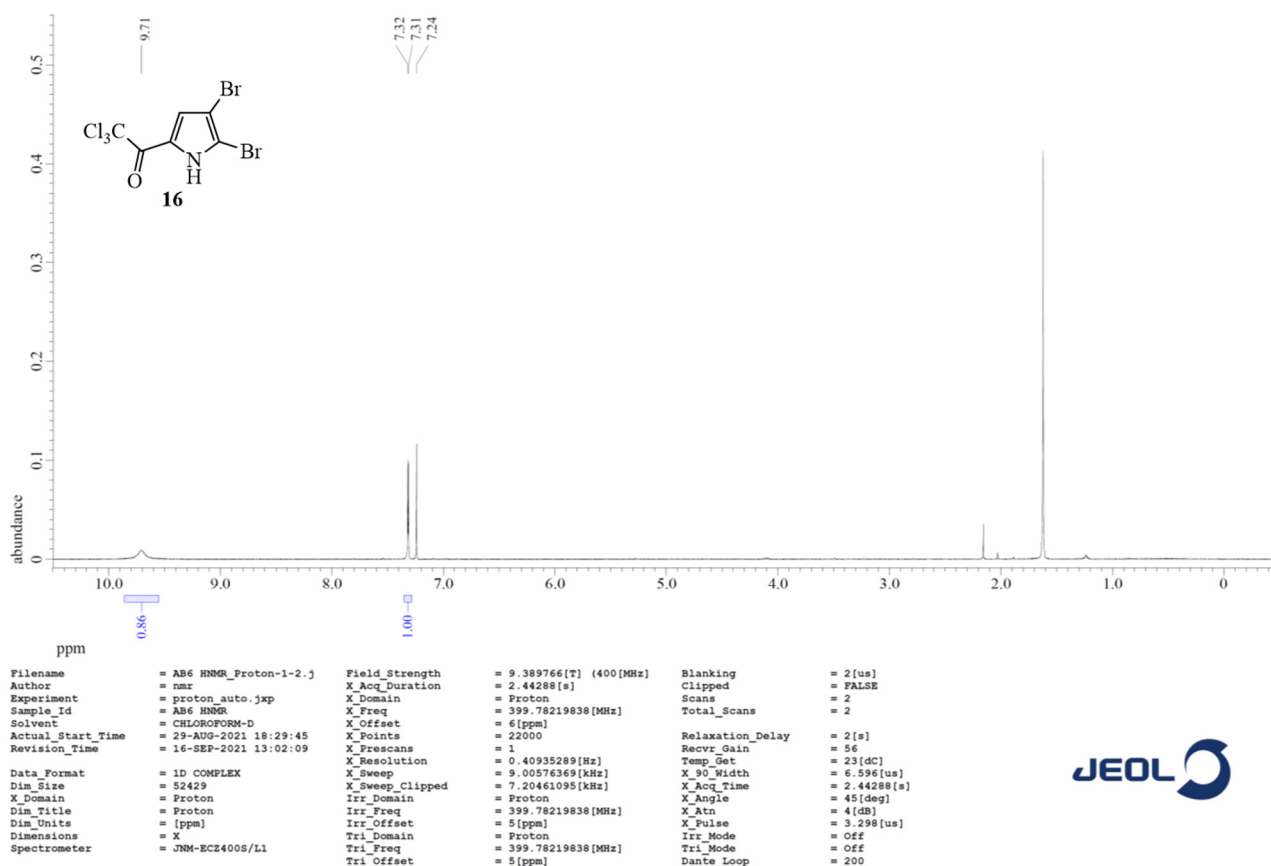<sup>1</sup>H NMR spectrum of compound **16** (400 MHz, CDCl<sub>3</sub>)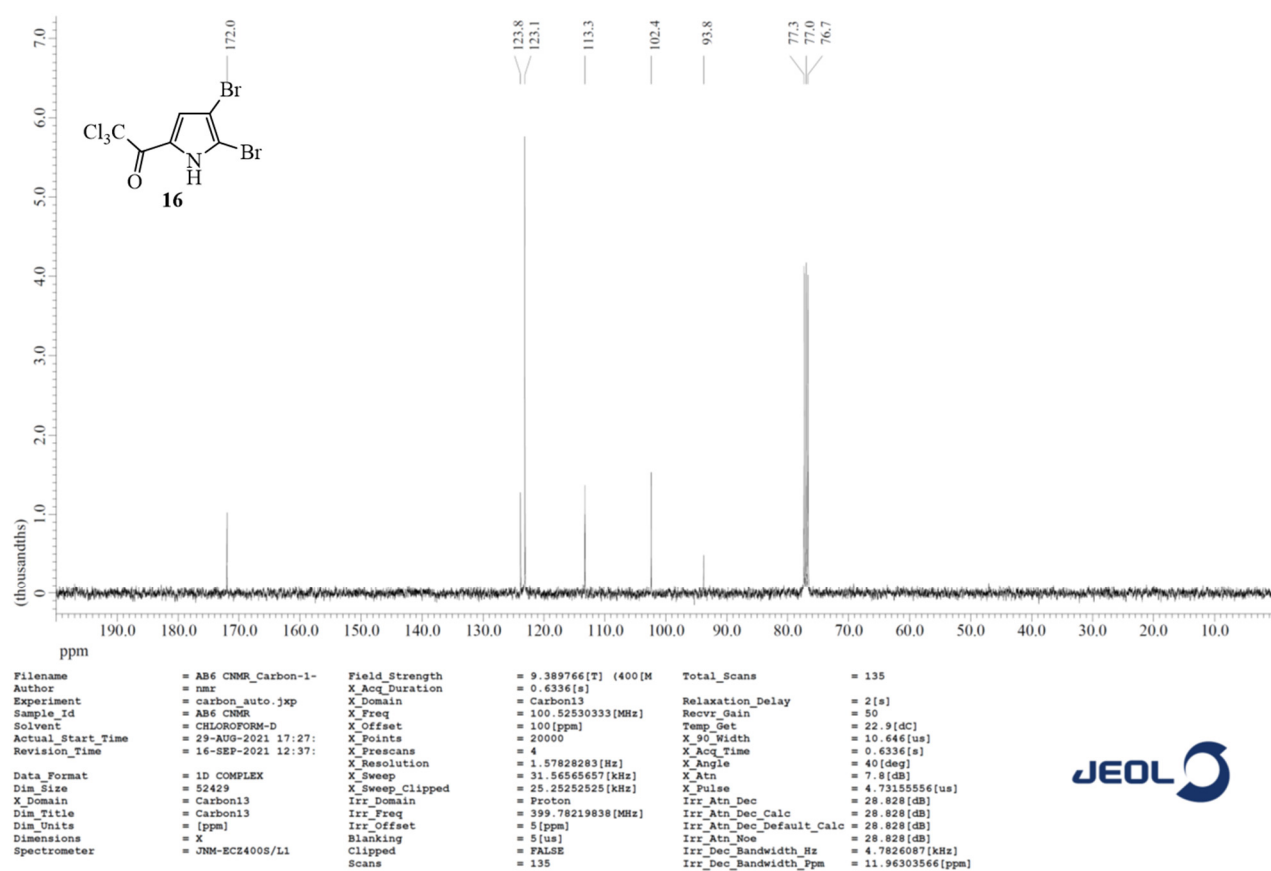<sup>13</sup>C NMR spectrum of compound **16** (100 MHz, CDCl<sub>3</sub>)

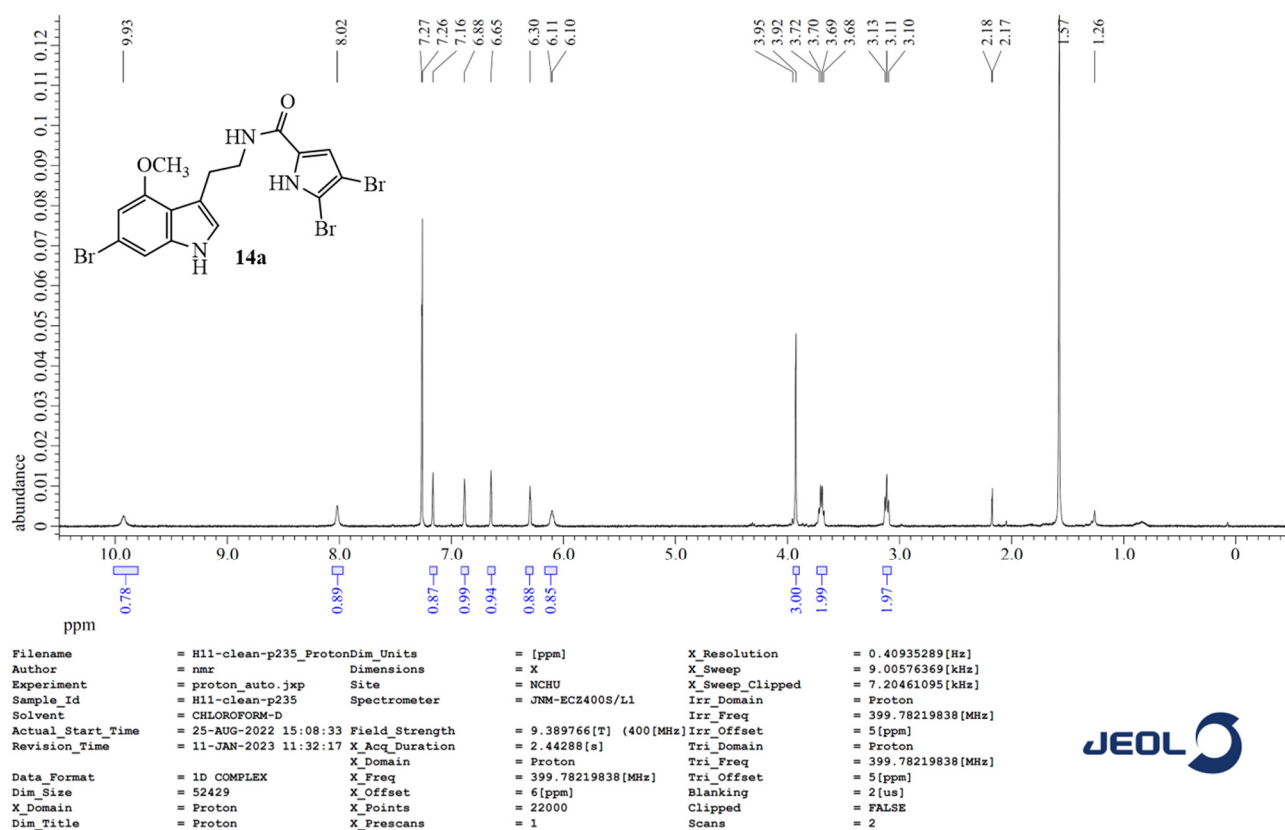<sup>1</sup>H NMR spectrum of compound **14a** (400 MHz, CDCl<sub>3</sub>)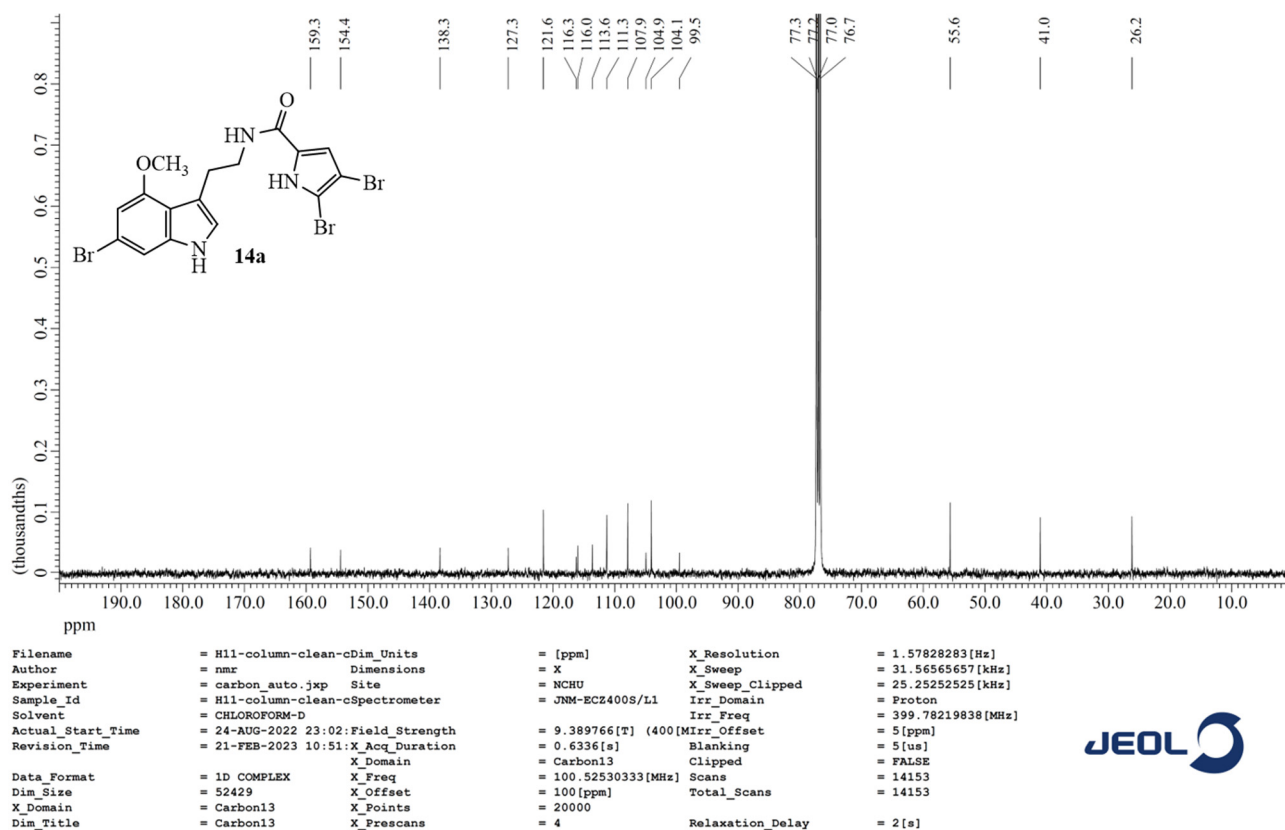<sup>13</sup>C NMR spectrum of compound **14a** (100 MHz, CDCl<sub>3</sub>)



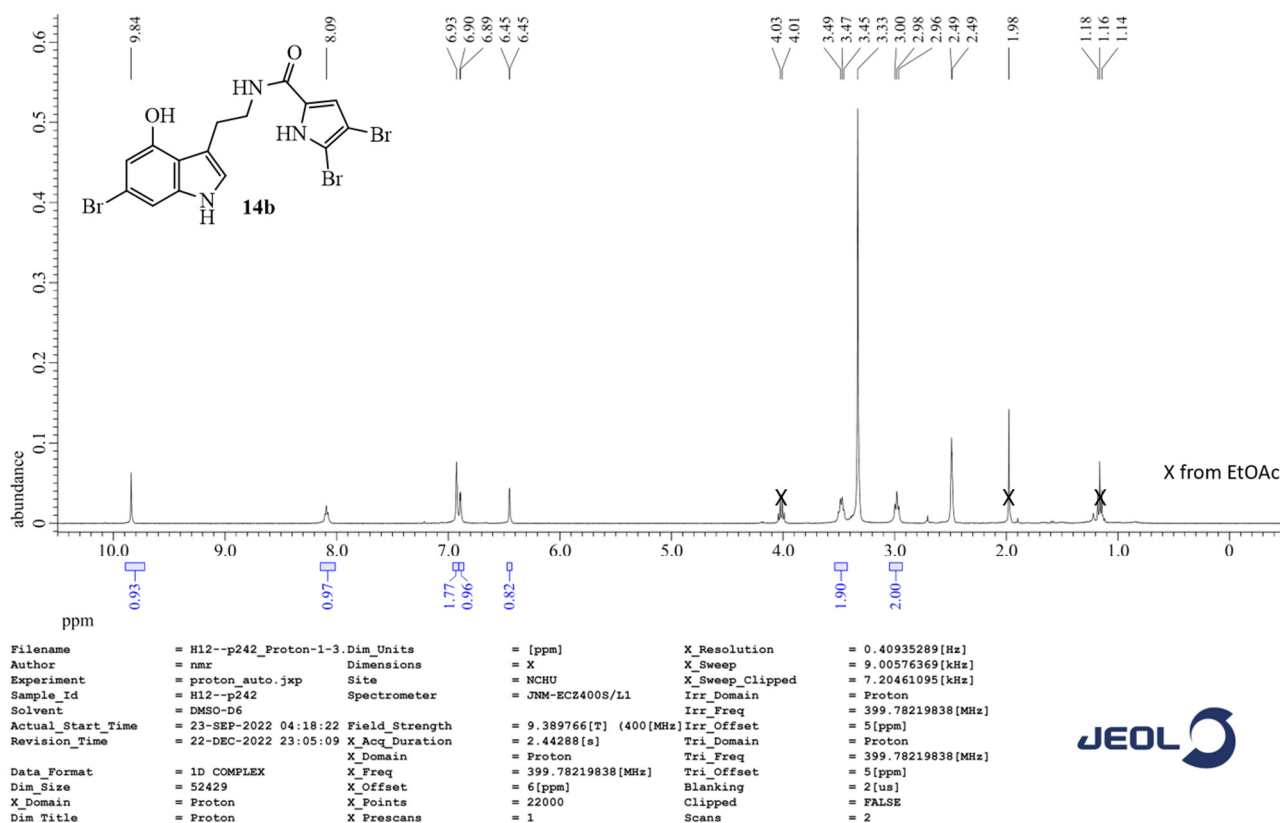<sup>1</sup>H NMR spectrum of compound **14b** (400 MHz, DMSO-*d*<sub>6</sub>)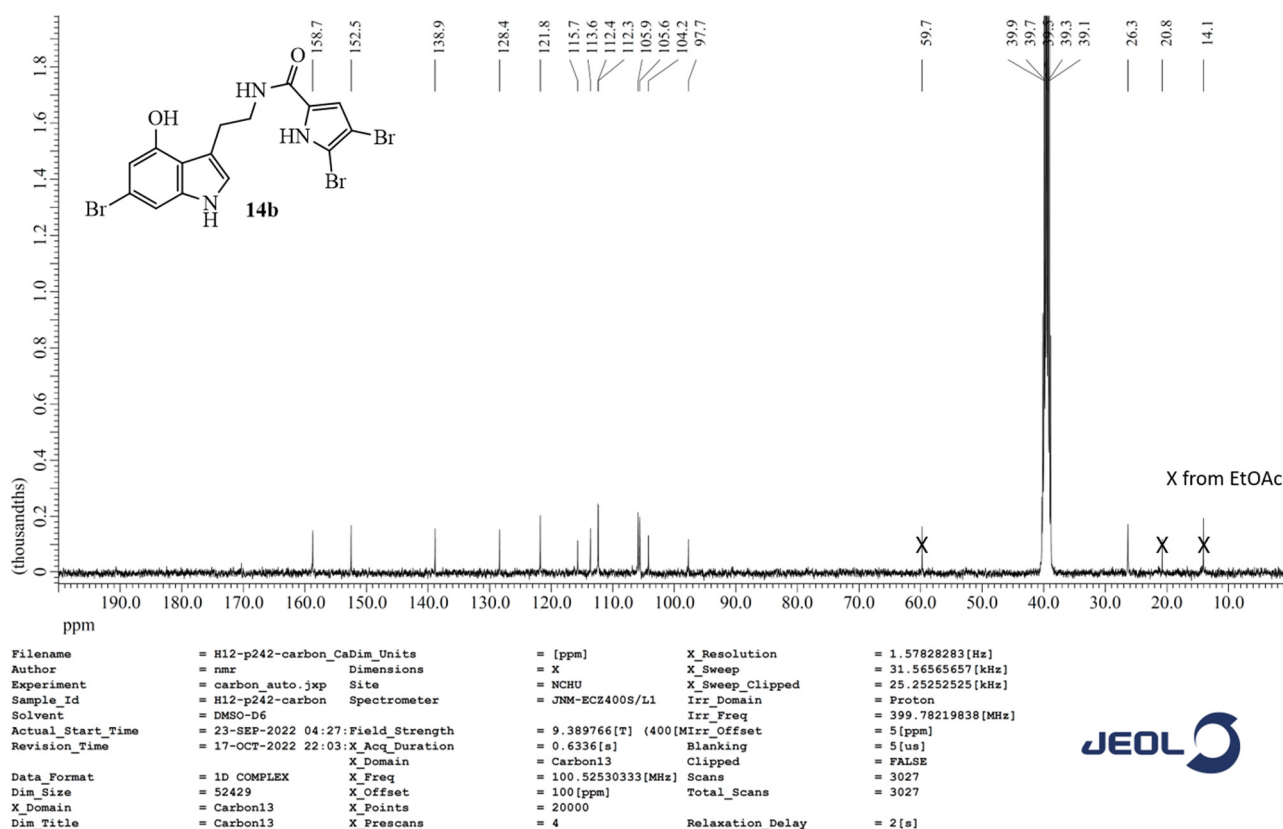<sup>13</sup>C NMR spectrum of compound **14b** (100 MHz, DMSO-*d*<sub>6</sub>)

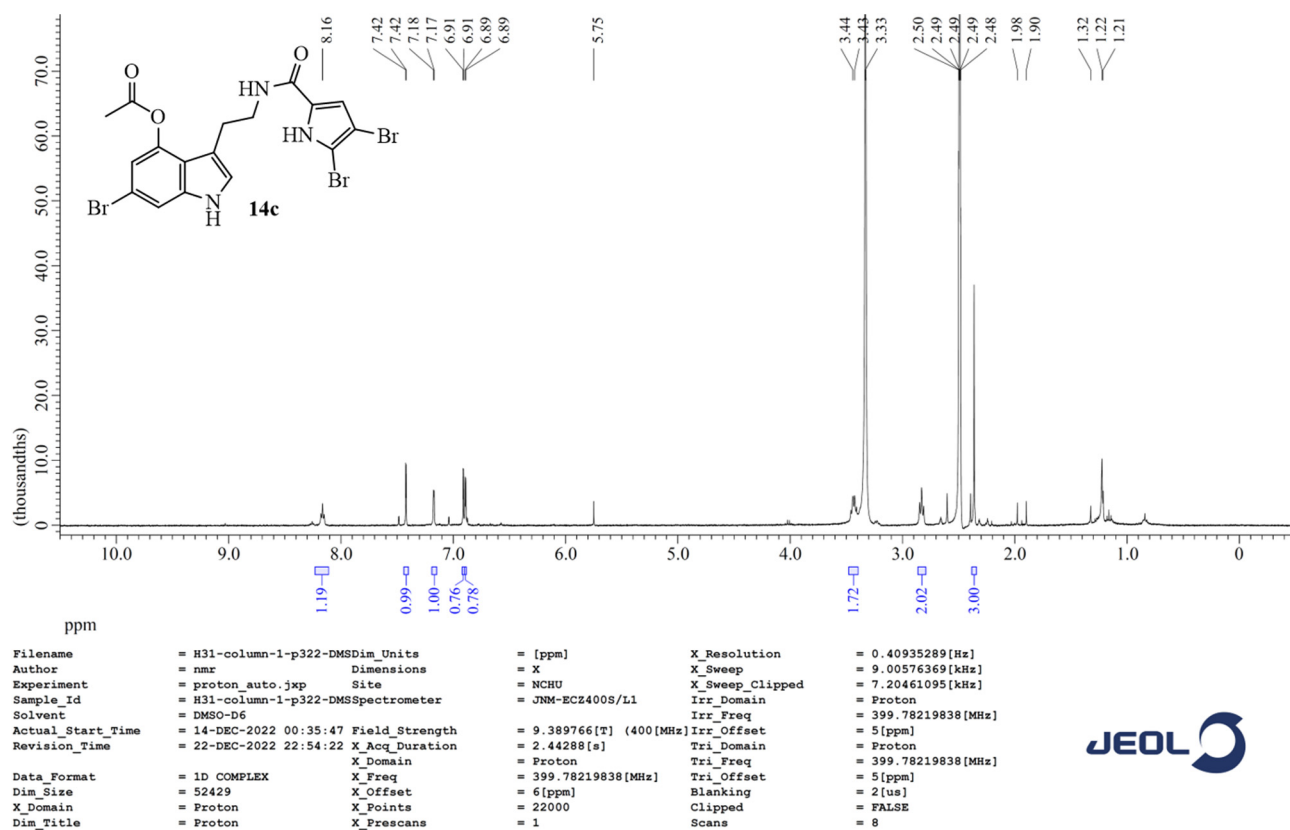<sup>1</sup>H NMR spectrum of compound **14c** (400 MHz, DMSO-*d*<sub>6</sub>)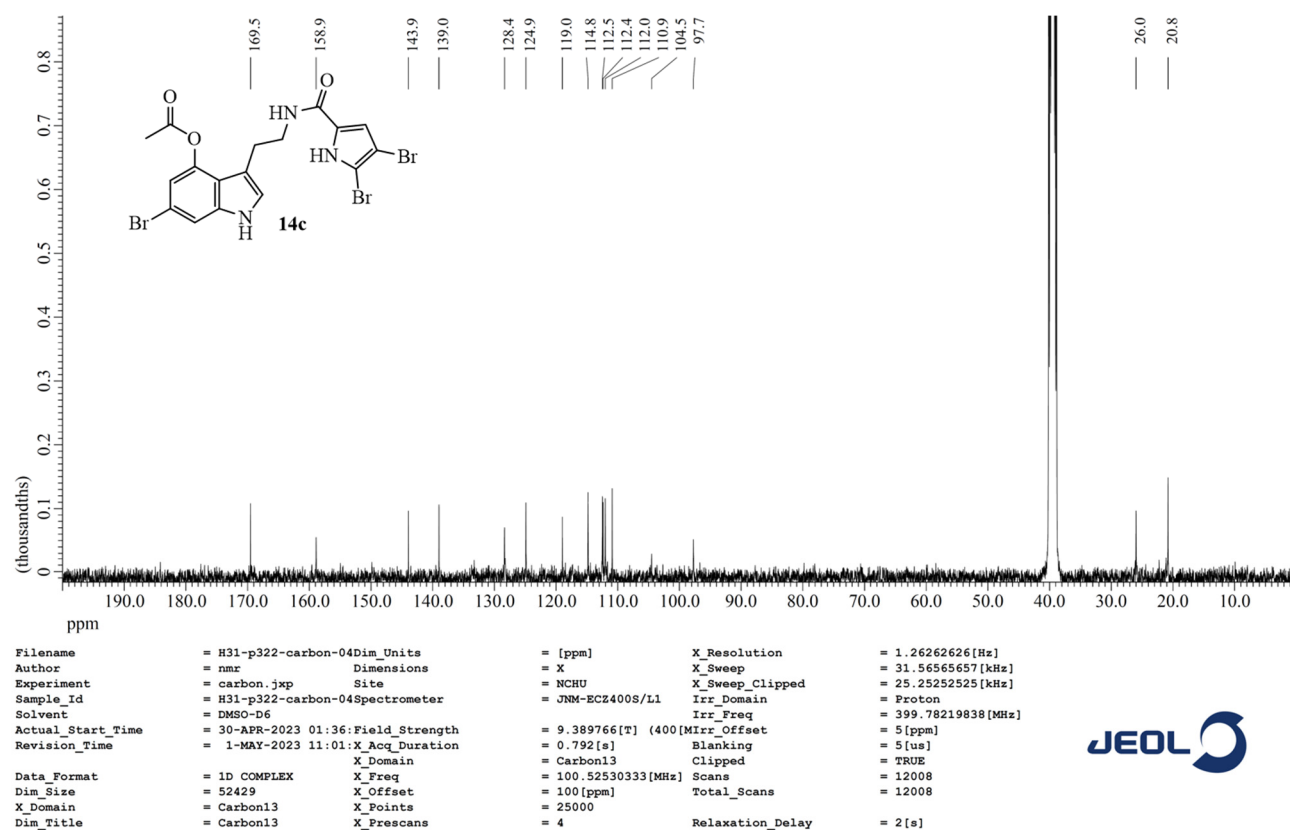<sup>13</sup>C NMR spectrum of compound **14c** (100 MHz, DMSO-*d*<sub>6</sub>)

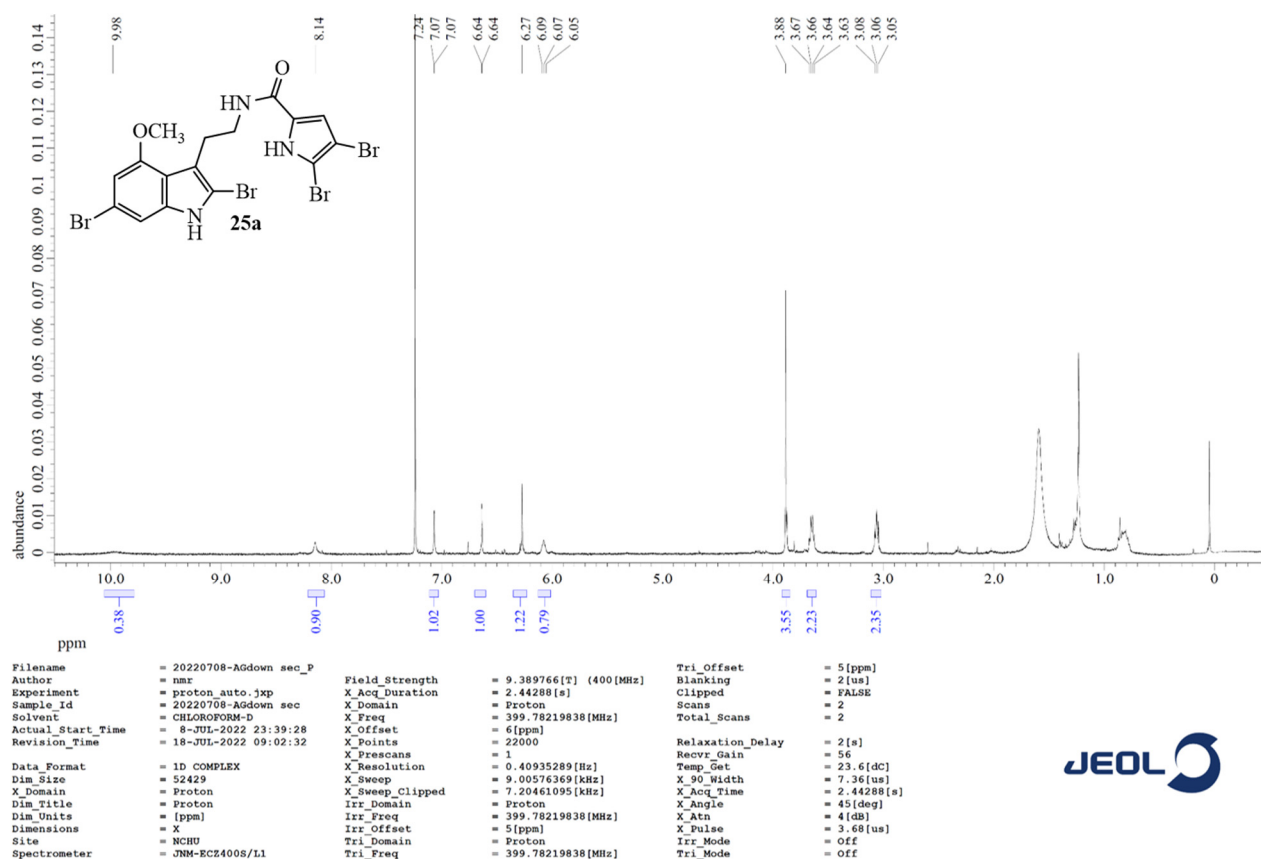<sup>1</sup>H NMR spectrum of compound **25a** (400 MHz, CDCl<sub>3</sub>)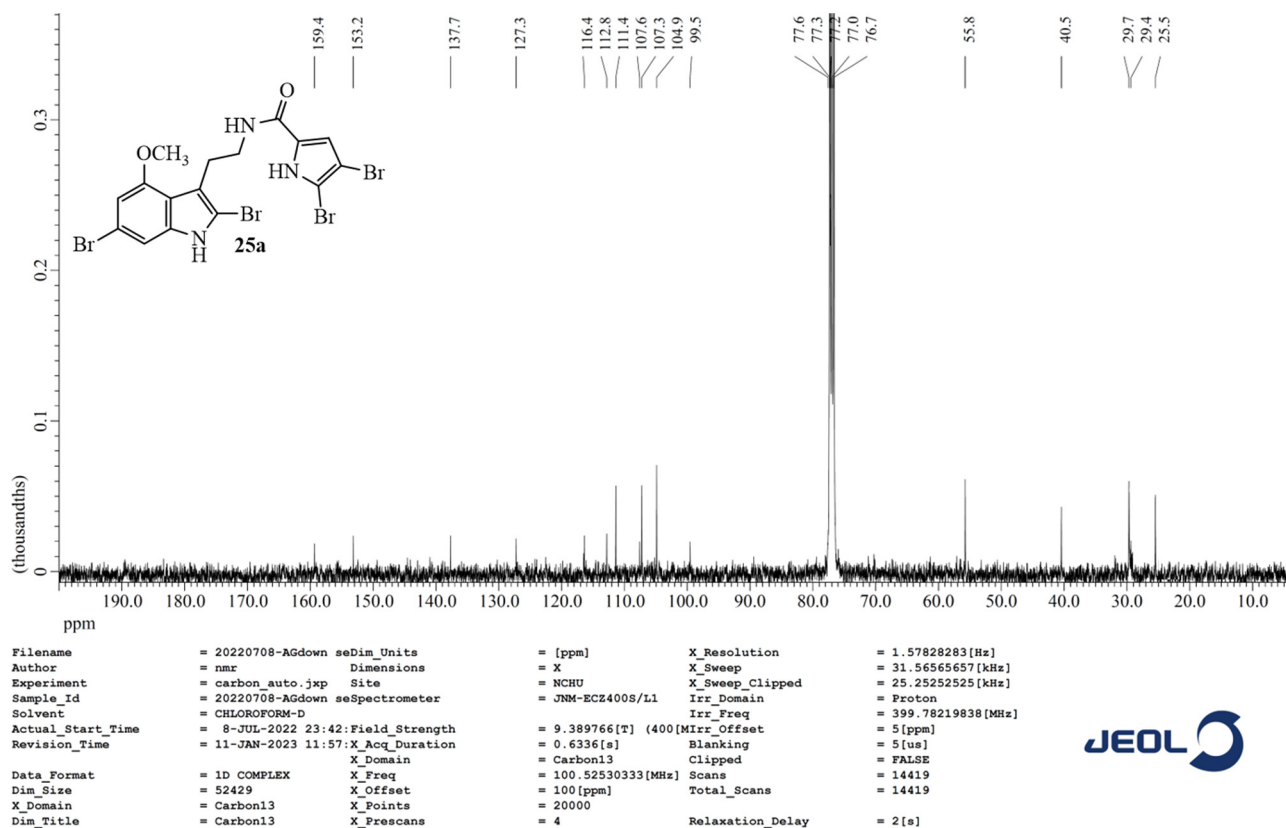<sup>13</sup>C NMR spectrum of compound **25a** (100 MHz, CDCl<sub>3</sub>)



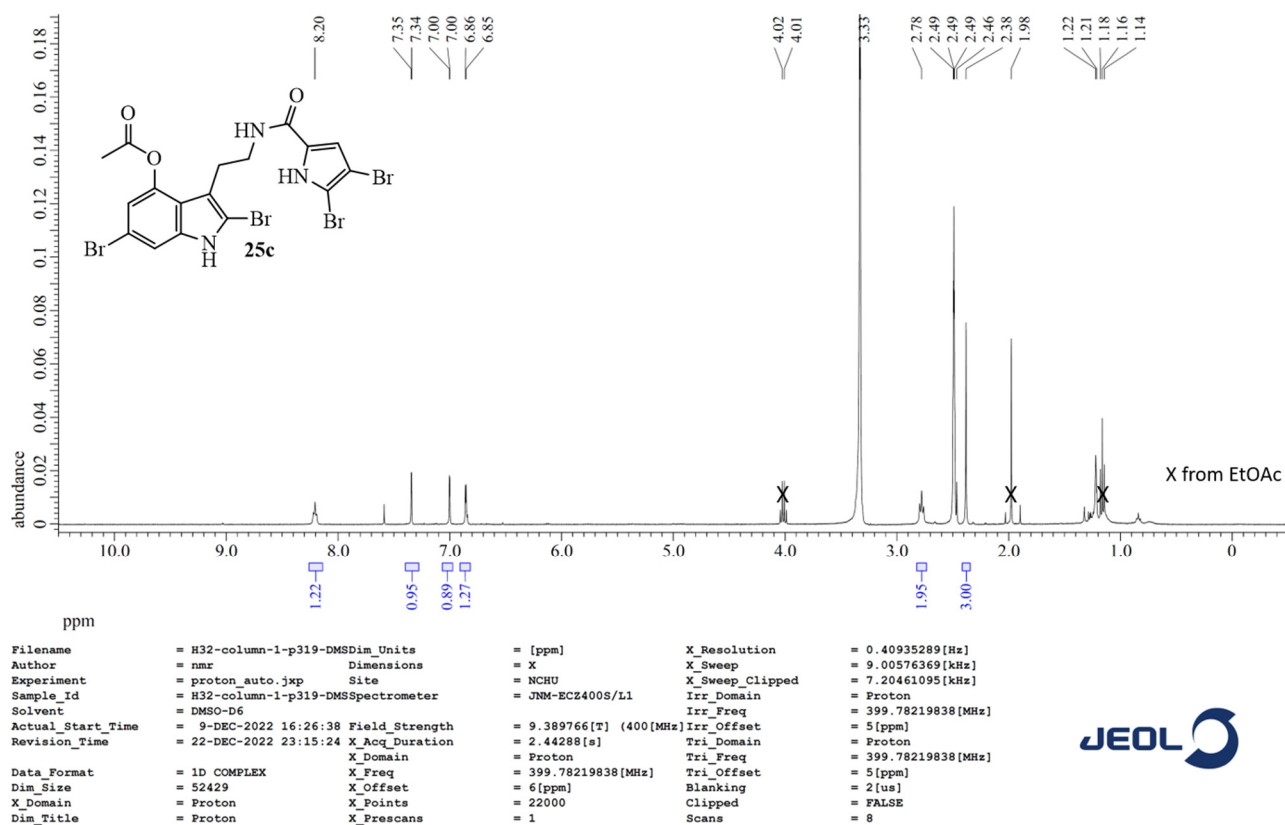**<sup>1</sup>H NMR spectrum of compound 25c (400 MHz, DMSO-*d*<sub>6</sub>)**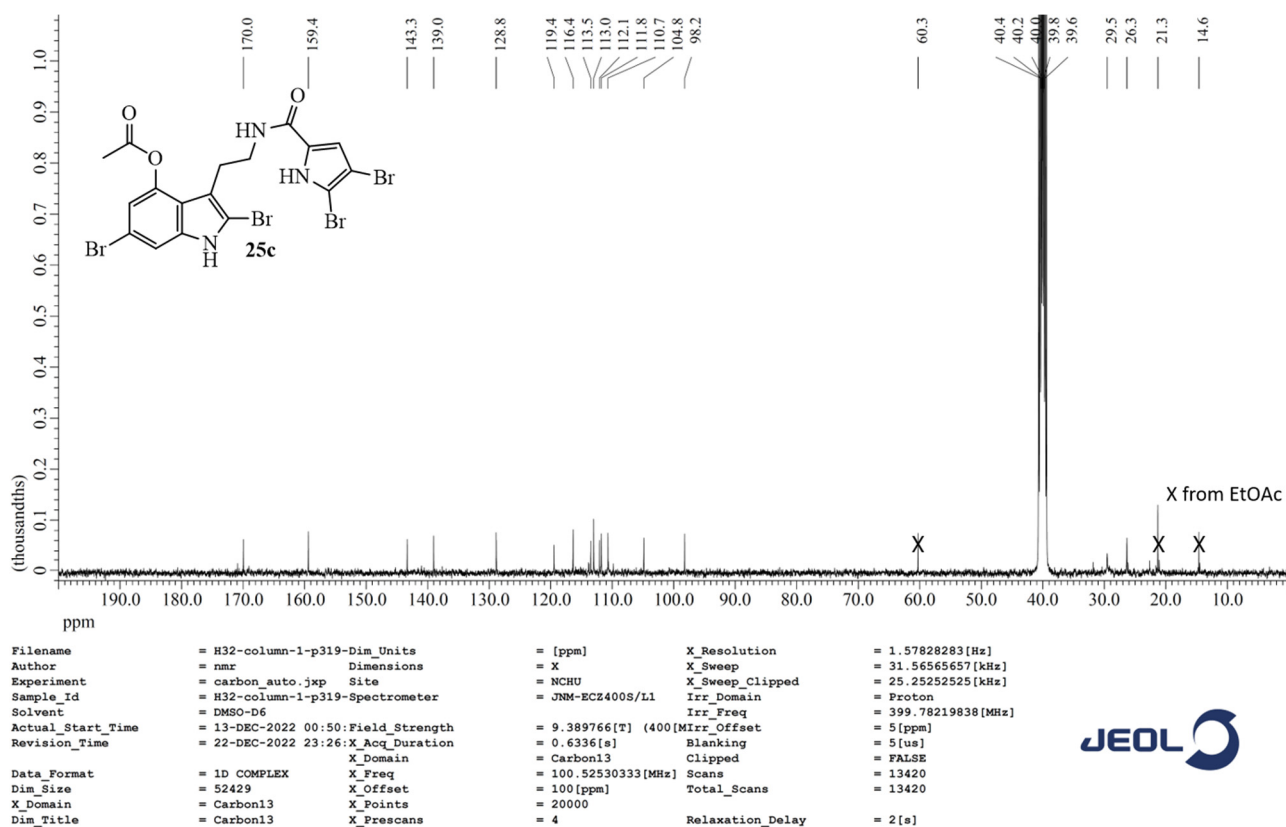**<sup>13</sup>C NMR spectrum of compound 25c (100 MHz, DMSO-*d*<sub>6</sub>)**

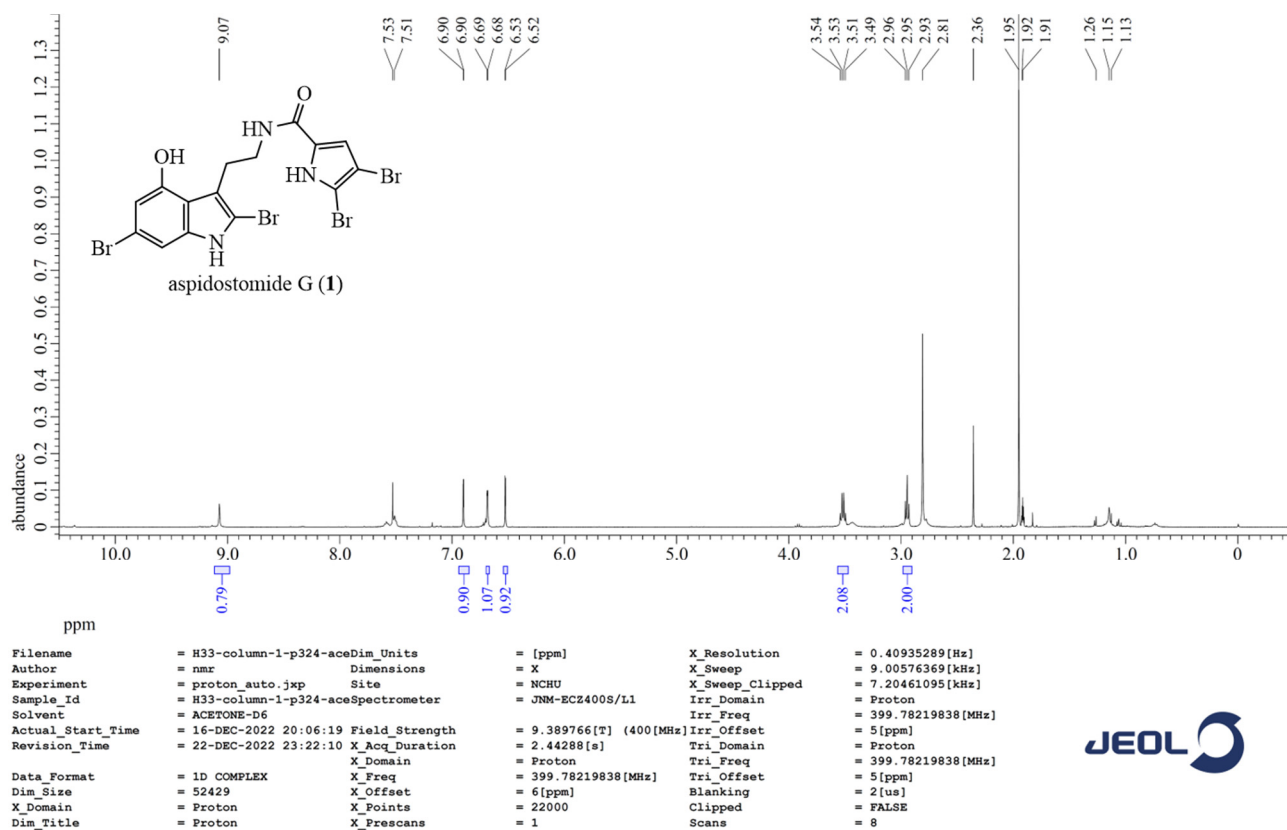<sup>1</sup>H NMR spectrum of aspidostomide G (1) (400 MHz, acetone-*d*<sub>6</sub>)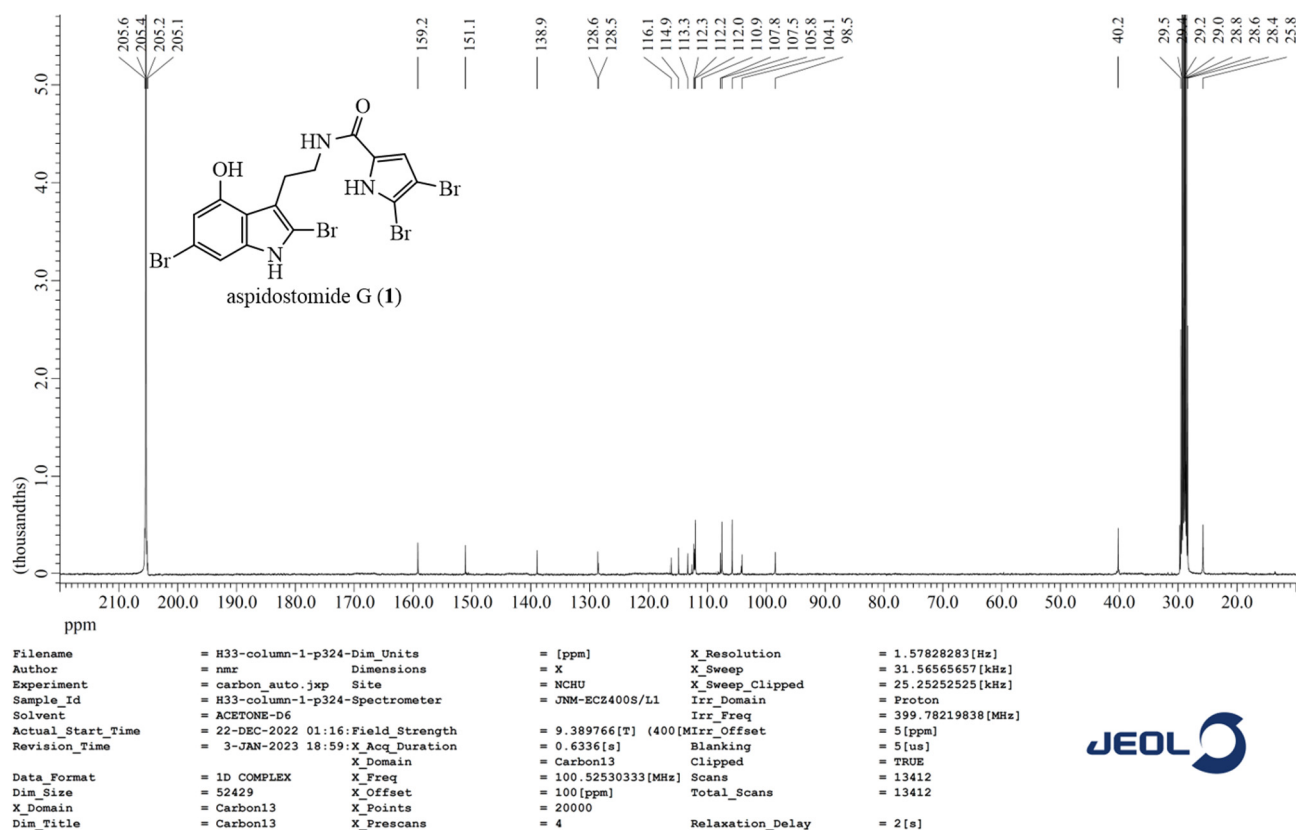<sup>13</sup>C NMR spectrum of aspidostomide G (1) (100 MHz, acetone-*d*<sub>6</sub>)

**References and Notes:**

1. G. G. Pawar, A. Brahmanandan and M. Kapur, *Org. Lett.*, 2016, **18**, 448.
2. K. T. Tran, J. S. Pallesen, S. M. Ø. Solbak, D. Narayanan, A. Baig, J. Zang, A. Aguayo-Orozco, R. M. C. Carmona, A. D. Garcia and A. Bach, *J. Med. Chem.*, 2019, **62**, 8028.
3. (a) S. K. Pandey, Y. Guttormsen, B. E. Haug, C. Hedberg and A. Bayer, *Org. Lett.*, 2015, **17**, 122; (b) A. H. Khan and J. S. Chen, *Org. Lett.*, 2015, **17**, 3718.
4. N. M. Hewlett and J. J. Tepe, *Org. Lett.*, 2011, **13**, 3718.
5. M. van Rensburg, B. R. Copp and D. Barker, *Eur. J. Org. Chem.*, 2018, 3065.
6. L. P. Patiño C, C. Muniain, M. E. Knott, L. Puricelli and J. A. Palermo, *J. Nat. Prod.*, 2014, **77**, 1170.
